# Supplementary material for: Peer review of the pesticide risk assessment of the active substance (3E )‐dec‐3‐en‐2‐one
Source: PubMed Central journal article supplement (PMC9868876; doi:10.2903/j.efsa.2023.7765), 2023-01-23
Supplement: EFS2-21-e07765-s001.pdf [file EFS2-21-e07765-s001.pdf]

Appendix to:

EFSA (European Food Safety Authority), 2023. Conclusion on the peer review of the pesticide risk assessment of the active substance (3E)-dec-3-en-2-one. EFSA Journal 2023;21(1):7765, 27 pp. doi:10.2903/j.efsa.2023.7765

© European Food Safety Authority, 2023

## Appendix B - List of end points for the active substance and the representative formulation

### Identity, Physical and Chemical Properties, Details of Uses, Further Information (Regulation (EU) N° 283/2013, Annex Part A, points 1.3 and 3.2)

|                                    |                                          |
|------------------------------------|------------------------------------------|
| Active substance (ISO Common Name) | (3E)-dec-3-en-2-one (no ISO common name) |
| Function (e.g. fungicide)          | Potato sprouting inhibitor               |
| Rapporteur Member State            | The Netherlands (NL)                     |
| Co-rapporteur Member State         | Not applicable                           |

### Identity (Regulation (EU) N° 283/2013, Annex Part A, point 1)

|                                                                                                                                           |                                   |
|-------------------------------------------------------------------------------------------------------------------------------------------|-----------------------------------|
| Chemical name (IUPAC)                                                                                                                     | (3E)-dec-3-en-2-one               |
| Chemical name (CA)                                                                                                                        | 3-decen-2-one                     |
| CIPAC No                                                                                                                                  | Not available                     |
| CAS No                                                                                                                                    | 18402-84-1                        |
| EC No (EINECS or ELINCS)                                                                                                                  | 701-234-2                         |
| FAO Specification (including year of publication)                                                                                         | No FAO specification              |
| Minimum purity of the active substance as manufactured                                                                                    | 980 g/kg                          |
| Location of the (proposed) reference specification (for significant impurities)                                                           | DAR Volume 4 (04/2022); page 33   |
| Identity of relevant impurities (of toxicological, ecotoxicological and/or environmental concern) in the active substance as manufactured | None                              |
| Molecular formula                                                                                                                         | C <sub>10</sub> H <sub>18</sub> O |
| Molar mass                                                                                                                                | 154.2 g/mol                       |

Structural formula

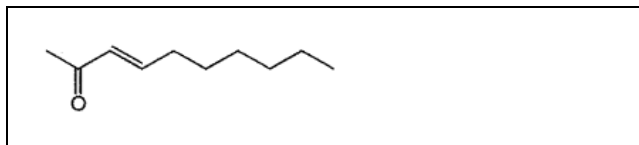

**Physical and chemical properties (Regulation (EU) N° 283/2013, Annex Part A, point 2)**

|                                                                     |                                                                                                                                                                                                                                                                                                                                            |
|---------------------------------------------------------------------|--------------------------------------------------------------------------------------------------------------------------------------------------------------------------------------------------------------------------------------------------------------------------------------------------------------------------------------------|
| Melting point (state purity)                                        | -40°C (98.6 % w/w)                                                                                                                                                                                                                                                                                                                         |
| Boiling point (state purity)                                        | 224°C (99.1 % w/w)                                                                                                                                                                                                                                                                                                                         |
| Temperature of decomposition (state purity)                         | No decomposition (up to 400°C) (98.6 % w/w)                                                                                                                                                                                                                                                                                                |
| Appearance (state purity)                                           | Clear, pale straw coloured, liquid (98.6 % w/w)                                                                                                                                                                                                                                                                                            |
| Vapour pressure (state temperature, state purity)                   | 430 Pa at 25°C (98.6 % w/w)                                                                                                                                                                                                                                                                                                                |
| Henry's law constant (state temperature)                            | 473.8 Pa m <sup>3</sup> mol <sup>-1</sup> (25°C)                                                                                                                                                                                                                                                                                           |
| Solubility in water (state temperature, state purity and pH)        | 0.14 g/L at 24°C (pH 7) (99.1% w/w)                                                                                                                                                                                                                                                                                                        |
| Solubility in organic solvents (state temperature, state purity)    | n-Heptane > 250 g/L (25°C) (98.6 % w/w)<br>p-Xylene > 250 g/L (25°C) (98.6 % w/w)<br>1,2-Dichloroethane > 250 g/L (25 °C) (98.6 % w/w)<br>Methanol > 250 g/L (25°C) (98.6 % w/w)<br>Acetone > 250 g/L (25°C) (98.6 % w/w)<br>Ethyl Acetate > 250 g/L (25°C) (98.6 % w/w)                                                                   |
| Surface tension (state concentration and temperature, state purity) | Neat active ingredient (98.6 % w/w)<br>At 20°C: 29.4 mN/m<br>At 40°C: 27.2 mN/m<br><br>In saturated water solution<br>At 20°C: 42.2 mN/m<br>At 40°C: 44.1 mN/m                                                                                                                                                                             |
| Partition coefficient (state temperature, pH and purity)            | Log Pow = 3.45 ± 0.02 at 24°C (98.1 % w/w)<br><br>pH 4: Log Pow = 3.45 at 22°C (98.6 % w/w)<br>pH 7: Log Pow = 3.47 at 22°C (98.6 % w/w)<br>pH 9: Log Pow = 3.43 at 22°C (98.6 % w/w)                                                                                                                                                      |
| Dissociation constant (state purity)                                | No dissociation constant between pH 4-10                                                                                                                                                                                                                                                                                                   |
| UV/VIS absorption (max.) incl. ε (state purity, pH)                 | ε = 4237 L mol <sup>-1</sup> cm <sup>-1</sup> at 198 nm in a neutral solution of methanol and water.<br>ε = 14153 L mol <sup>-1</sup> cm <sup>-1</sup> at 224 nm in neutral solution of methanol and water.<br>Decomposes under acidic and alkaline conditions (in methanol)<br>at λ > 290 nm: ε < 10 L mol <sup>-1</sup> cm <sup>-1</sup> |
| Flammability (state purity)                                         | Flashpoint = 99°C (98.6 % w/w)<br>Auto-flammability = 275°C (98.6 % w/w)                                                                                                                                                                                                                                                                   |
| Explosive properties (state purity)                                 | Not explosive (statement)                                                                                                                                                                                                                                                                                                                  |
| Oxidising properties (state purity)                                 | Not oxidising (statement)                                                                                                                                                                                                                                                                                                                  |

**Summary of representative uses evaluated, for which all risk assessments needed to be completed (name of active substance or the respective variant)**

(Regulation (EU) N° 284/2013, Annex Part A, points 3, 4)

| Crop and/or situation (a)             | Member State or Country                            | Product name | F G or I (b) | Pests or Group of pests controlled (c)  | Preparation |                | Application                 |                                     |                    |                                    | Application rate per treatment |                    |                                                                      | PHI (days) (m) | Remarks                                                                                                                                                                   |
|---------------------------------------|----------------------------------------------------|--------------|--------------|-----------------------------------------|-------------|----------------|-----------------------------|-------------------------------------|--------------------|------------------------------------|--------------------------------|--------------------|----------------------------------------------------------------------|----------------|---------------------------------------------------------------------------------------------------------------------------------------------------------------------------|
|                                       |                                                    |              |              |                                         | Type (d-f)  | Conc. a.s. (i) | method kind (f-h)           | range of growth stages & season (j) | number min-max (k) | Interval between application (min) | kg a.s./hL min-max (l)         | Water L/ha min-max | g a.s./ton min-max (l)                                               |                |                                                                                                                                                                           |
| Potatoes (SOLTU)<br>(ware and starch) | AT, BE, CZ, DE, ES, FR, IE, IT, LU, NL, PL, PT, UK | SmartB lock® | I            | growth regulator effect: sprout control | HN          | 980 g/kg       | Hot fogging tuber treatment | During storage. BBCH 01-03. Jan-Dec | Max. 4             | min. 4 weeks                       | N.A.                           | N.A.               | 112 g a.s./ton potatoes<br><br>Total per season: max: 448 g a.s./ton | 14*            | - Apply when the tubers have broken dormancy and show initial signs of sprouting<br>- Re-apply as required.<br>* Minimum interval between last application and unloading. |

(a) For crops, the EU and Codex classifications (both) should be taken into account; where relevant, the use situation should be described (e.g. fumigation of a structure)  
 (b) Outdoor or field use (F), greenhouse application (G) or indoor application (I)  
 (c) e.g. biting and sucking insects, soil born insects, foliar fungi, weeds  
 (d) e.g. wettable powder (WP), emulsifiable concentrate (EC), granule (GR)  
 (e) CropLife International Technical Monograph no 2, 6th Edition. Revised May 2008. Catalogue of pesticide  
 (f) All abbreviations used must be explained  
 (g) Method, e.g. high volume spraying, low volume spraying, spreading, dusting, drench  
 (h) Kind, e.g. overall, broadcast, aerial spraying, row, individual plant, between the plant- type of equipment used must be indicated

(i) g/kg or g/L. Normally the rate should be given for the active substance (according to ISO) and not for the variant in order to compare the rate for same active substances used in different variants (e.g. fluoroxypyr). **In certain cases, where only one variant is synthesised, it is more appropriate to give the rate for the variant (e.g. benthialicarb-isopropyl).**  
 (j) Growth stage range from first to last treatment (BBCH Monograph, Growth Stages of Plants, 1997, Blackwell, ISBN 3-8263-3152-4), including where relevant, information on season at time of application  
 (k) Indicate the minimum and maximum number of applications possible under practical conditions of use  
 (l) The values should be given in g or kg whatever gives the more manageable number (e.g. 200 kg/ha instead of 200 000 g/ha or 12.5 g/ha instead of 0.0125 kg/ha)  
 (m) PHI - minimum pre-harvest interval

**Summary of additional intended uses for which MRL applications have been made, that in addition to the uses above, have also been considered in the consumer risk assessment (name of active substance or the respective variant)**

**Regulation (EC) N° 1107/2009 Article 8.1(g)**

Not relevant

### Further information, Efficacy

#### Effectiveness (Regulation (EU) N° 284/2013, Annex Part A, point 6.2)

The claimed use is supported. The proposed dose rate is realistic.

#### Adverse effects on field crops (Regulation (EU) N° 284/2013, Annex Part A, point 6.4)

The claimed use is supported. No unacceptable adverse effects are expected at the proposed rate.

#### Observations on other undesirable or unintended side-effects (Regulation (EU) N° 284/2013, Annex Part A, point 6.5)

The claimed use is supported, no unacceptable unintended side effects are expected at the proposed dose rate.

#### Groundwater metabolites: Screening for biological activity (SANCO/221/2000-rev.10-final Step 3 a Stage 1)

Activity against target organism

No relevant metabolites

## Methods of Analysis

### Analytical methods for the active substance (Regulation (EU) N° 283/2013, Annex Part A, point 4.1 and Regulation (EU) N° 284/2013, Annex Part A, point 5.2)

|                                                     |                                           |
|-----------------------------------------------------|-------------------------------------------|
| Technical a.s. (analytical technique)               | Quantification GC-FID, confirmation GC-MS |
| Impurities in technical a.s. (analytical technique) | Quantification GC-FID, confirmation GC-MS |
| Plant protection product (analytical technique)     | Identical to technical a.s.               |

### Analytical methods for residues (Regulation (EU) N° 283/2013, Annex Part A, point 4.2 & point 7.4.2)

#### Residue definitions for monitoring purposes

|                         |                                                                            |
|-------------------------|----------------------------------------------------------------------------|
| Food of plant origin    | (3E)-3-decen-2-one                                                         |
| Food of animal origin   | Residue definition could not be concluded due to data gap (see section 3). |
| Soil                    | Not required (No definition proposed).                                     |
| Sediment                | Not applicable                                                             |
| Water surface           | Not required (No definition proposed).                                     |
| drinking/ground         | Not required (No definition proposed).                                     |
| Air                     | Not required (No definition proposed).                                     |
| Body fluids and tissues | Not required (No definition proposed).                                     |

## Monitoring/Enforcement methods

Food/feed of plant origin (analytical technique and LOQ for methods for monitoring purposes)

Primary method + ILV: (3E)-dec-3-en-2-one-with GC-MS/MS (SIM-mode, confirmation methods provided), LOQ 0.01 mg/kg in potato (peel and pulp, high water matrix).

Data gaps:

1. Validated analytical method(s) for monitoring residues of (3E)-dec-3-en-2-one in dry, high acid and high oil content commodities.
2. Data to address the extraction efficiency of the procedure used in the monitoring method for high water content commodities.

Food/feed of animal origin (analytical technique and LOQ for methods for monitoring purposes)

No method provided. Pending on the final residue definition for monitoring in food of animal origin, analytical methods might be required.

Soil (analytical technique and LOQ)

Method: (3E)-dec-3-en-2-one monitored with GC-MS/MS (two mass transitions), LOQ 0.01 mg/kg.



|                                                        |                                                                                                                                                                                                                                                                                                                      |
|--------------------------------------------------------|----------------------------------------------------------------------------------------------------------------------------------------------------------------------------------------------------------------------------------------------------------------------------------------------------------------------|
| Water (analytical technique and LOQ)                   | <p>Drinking water/Groundwater:</p> <p>Primary method + ILV: (3E)-dec-3-en-2-one monitored with GC-MS (SIM-mode, confirmation method provided), LOQ 0.1 µg/L.</p> <p>Surface water:</p> <p>Primary method + ILV: (3E)-dec-3-en-2-one monitored with GC-MS (SIM-mode, confirmation method provided), LOQ 0.1 µg/L.</p> |
| Air (analytical technique and LOQ)                     | <p>Method: (3E)-dec-3-en-2-one monitored with GC-MS (SIM-mode, confirmation transition provided), LOQ 0.1 mg/m<sup>3</sup>.</p>                                                                                                                                                                                      |
| Body fluids and tissues (analytical technique and LOQ) | <p>Method: (3E)-dec-3-en-2-one monitored with GC-MS/MS (two mass transitions), LOQ 0.01 mg/L (fluids) or 0.01 mg/kg (tissues).</p>                                                                                                                                                                                   |

### Classification and labelling with regard to physical and chemical data (Regulation (EU) N° 283/2013, Annex Part A, point 10)

Substance

Harmonised classification according to Regulation (EC) No 1272/2008 and its Adaptations to Technical Process [Table 3.1 of Annex VI of Regulation (EC) No 1272/2008 as amended]<sup>1</sup>:

According to the peer review, criteria for harmonised classification according to Regulation (EC) No 1272/2008 may be met for:

|                                                                                                  |
|--------------------------------------------------------------------------------------------------|
| (3E)-dec-3-en-2-one                                                                              |
| <p>No current harmonised classification.</p> <p>RAC Opinion (2022):</p> <p>Asp. Tox. 1; H304</p> |
| <p>See box above.</p>                                                                            |

<sup>1</sup> Regulation (EC) No 1272/2008 of the European Parliament and of the Council of 16 December 2008 on classification, labelling and packaging of substances and mixtures, amending and repealing Directives 67/548/EEC and 1999/45/EC, and amending Regulation (EC) No 1907/2006. OJ L 353, 31.12.2008, 1-1355.

## Impact on Human and Animal Health

### Absorption, distribution, metabolism and excretion (toxicokinetics) (Regulation (EU) N° 283/2013, Annex Part A, point 5.1)

|                                                             |                                                                                                                                                                                                                                                                                                                                                                                                                                 |
|-------------------------------------------------------------|---------------------------------------------------------------------------------------------------------------------------------------------------------------------------------------------------------------------------------------------------------------------------------------------------------------------------------------------------------------------------------------------------------------------------------|
| Rate and extent of oral absorption/systemic bioavailability | The systemic bioavailability (calculated based on AUC <sub>t</sub> ) of total [ <sup>14</sup> C], following single high dose oral administration, was approximately 91%.                                                                                                                                                                                                                                                        |
| Toxicokinetics                                              | <p><u>Oral administration (1000 mg/kg bw)</u></p> <p>C<sub>max</sub> (ng/mL) = 0.920<br/> T<sub>max</sub> (h) = 4<br/> Plasma T<sub>1/2</sub> (h) = 7.97</p> <p><u>Intravenous administration (1 mg/kg bw)</u></p> <p>C<sub>max</sub> (ng/mL) = 0.312<br/> T<sub>max</sub> (h) = 0.083<br/> Plasma T<sub>1/2</sub> (h) = 0.0631</p>                                                                                             |
| Distribution                                                | Expected to be widely distributed                                                                                                                                                                                                                                                                                                                                                                                               |
| Potential for bioaccumulation                               | No evidence for accumulation                                                                                                                                                                                                                                                                                                                                                                                                    |
| Rate and extent of excretion                                | Expected to be mainly excreted via urine                                                                                                                                                                                                                                                                                                                                                                                        |
| Metabolism in animals                                       | The likely metabolic pathways are via reduction of the carbon-carbon double bond and/or the carbonyl moiety, followed by conjugation with glucuronide and excretion via urine. Conjugation with glutathione and subsequent metabolism via the mercapturic acid pathway is also possible. All three of these pathways result in a loss of the α,β-unsaturated moiety. Ω-Oxidation at C <sub>10</sub> is also a potential pathway |
| <i>In vitro</i> metabolism                                  | No data. Not required.                                                                                                                                                                                                                                                                                                                                                                                                          |
| Toxicologically relevant compounds (animals and plants)     | (3E)-dec-3-en-2-one                                                                                                                                                                                                                                                                                                                                                                                                             |
| Toxicologically relevant compounds (environment)            | (3E)-dec-3-en-2-one                                                                                                                                                                                                                                                                                                                                                                                                             |

### Acute toxicity (Regulation (EU) N° 283/2013, Annex Part A, point 5.2)

|                                 |                          |                 |
|---------------------------------|--------------------------|-----------------|
| Rat LD <sub>50</sub> oral       | >5000 mg/kg bw           |                 |
| Rat LD <sub>50</sub> dermal     | >5000 mg/kg bw           |                 |
| Rat LC <sub>50</sub> inhalation | 0.52-2.04 mg/L (>1 mg/L) | Acute Tox 4     |
| Skin irritation                 | Irritant                 | Skin Irritant 2 |
| Eye irritation                  | Non-irritant             |                 |

|                    |                       |                          |
|--------------------|-----------------------|--------------------------|
| Skin sensitisation | Sensitising (Buehler) | Skin Sens 1 <sup>2</sup> |
| Phototoxicity      | Not required.         |                          |

### Short-term toxicity (Regulation (EU) N° 283/2013, Annex Part A, point 5.3)

|                                |                                                                                                                                                                                                                                                                                                                                    |  |
|--------------------------------|------------------------------------------------------------------------------------------------------------------------------------------------------------------------------------------------------------------------------------------------------------------------------------------------------------------------------------|--|
| Target organ / critical effect | Lungs: macroscopic findings (i.e. incomplete deflation, abnormal colouration, firm, enlarged tracheobronchial and mediastinal lymph nodes), increase relative and absolute weight at 531 µg/L;<br>Body weight change (reduced), food consumption (reduced) and microscopic findings (increased incidence and severity) at 278 µg/L |  |
| Relevant oral NOAEL            | No data – not required                                                                                                                                                                                                                                                                                                             |  |
| Relevant dermal NOAEL          | No data – not required                                                                                                                                                                                                                                                                                                             |  |
| Relevant inhalation NOAEL      | 139 µg/L, corresponding to 27 mg/kg bw per day                                                                                                                                                                                                                                                                                     |  |

### Genotoxicity (Regulation (EU) N° 283/2013, Annex Part A, point 5.4)

|                            |                                                                                                                                                                                                    |  |
|----------------------------|----------------------------------------------------------------------------------------------------------------------------------------------------------------------------------------------------|--|
| <i>In vitro</i> studies    | Negative in Ames test<br>Positive in gene mutation assay <i>in vitro</i> with mammalian cells (without metabolic activation)                                                                       |  |
| <i>In vivo</i> studies     | Negative in micronucleus test <i>in vivo</i> (with proof of bone marrow exposure)<br>Negative in UDS assay in liver <i>in vivo</i><br>Negative in Comet assay in liver and duodenum <i>in vivo</i> |  |
| Photomutagenicity          | Not required                                                                                                                                                                                       |  |
| Potential for genotoxicity | (E)-3-decen-2-one is unlikely to be genotoxic                                                                                                                                                      |  |

### Long-term toxicity and carcinogenicity (Regulation (EU) N°283/2013, Annex Part A, point 5.5)

|                                                  |                        |  |
|--------------------------------------------------|------------------------|--|
| Long-term effects (target organ/critical effect) | No data – not required |  |
| Relevant long-term NOAEL                         | No data – not required |  |
| Carcinogenicity (target organ, tumour type)      | No data – not required |  |
| Relevant NOAEL for carcinogenicity               | No data – not required |  |

<sup>2</sup> Skin sensitisation classification has been proposed in the DAR but it was eventually not confirmed by RAC Opinion (2022) (See also section Classification with regard to toxicological data (Regulation (EU) N° 283/2013, Annex Part A, Section 10)

**Reproductive toxicity (Regulation (EU) N° 283/2013, Annex Part A, point 5.6)**
**Reproduction toxicity**

|                                       |                        |  |
|---------------------------------------|------------------------|--|
| Reproduction target / critical effect | No data – not required |  |
| Relevant parental NOAEL               | No data – not required |  |
| Relevant reproductive NOAEL           | No data – not required |  |
| Relevant offspring NOAEL              | No data – not required |  |

**Developmental toxicity**

|                                        |                                                                                 |  |
|----------------------------------------|---------------------------------------------------------------------------------|--|
| Developmental target / critical effect | Rat:<br>Maternal: Reduced body weight gain<br>Developmental toxicity: no effect |  |
| Relevant maternal NOAEL                | Rat: 300 mg/kg bw per day                                                       |  |
| Relevant developmental NOAEL           | Rat: 1000 mg/kg bw per day (highest dose tested)                                |  |

**Neurotoxicity (Regulation (EU) N° 283/2013, Annex Part A, point 5.7)**

|                                                                              |                        |  |
|------------------------------------------------------------------------------|------------------------|--|
| Acute neurotoxicity                                                          | No data - not required |  |
| Repeated neurotoxicity                                                       | No data - not required |  |
| Additional studies (e.g. delayed neurotoxicity, developmental neurotoxicity) | No data - not required |  |

**Other toxicological studies (Regulation (EU) N° 283/2013, Annex Part A, point 5.8)**

|                                               |                                                                                                                                                                                                                                                                                                                                                                                         |  |
|-----------------------------------------------|-----------------------------------------------------------------------------------------------------------------------------------------------------------------------------------------------------------------------------------------------------------------------------------------------------------------------------------------------------------------------------------------|--|
| Supplementary studies on the active substance | None.                                                                                                                                                                                                                                                                                                                                                                                   |  |
| Endocrine disrupting properties               | ED assessment can be waived; ED criteria are not met. In view of the intrinsic properties of the active substance, the assessment does not appear scientifically necessary. (3E)-dec-3-en-2-one does not meet the criteria for endocrine disruption for humans according to point 3.6.5 of Annex II to Regulation (EC) No 1107/2009, as amended by Commission Regulation (EU) 2018/605. |  |

Studies performed on metabolites or impurities

**2-decanol:**

Based on read-across to 1-decanol, 2-decanol is expected to be of similar low oral toxicity as the parent. Reference values of the parent can be used.

**2-decanone:**

LD<sub>50</sub> = 7937 mg/kg bw in mice, 7940 mg/kg bw in rat

Based on read-across to methyl nonyl ketone and other aliphatic ketone compounds, 2-decanone is expected to be of similar low oral toxicity as the parent. Reference values of the parent can be used.

**3-decen-2-ol** (free and conjugated): data gap for genotoxicity potential and general toxicity.

**Medical data (Regulation (EU) N° 283/2013, Annex Part A, point 5.9)**

No adverse reactions reported during medical surveillance of manufacturing plant personnel.

**Summary<sup>3</sup> (Regulation (EU) N°1107/2009, Annex II, point 3.1 and 3.6)**

|                                                  | Value<br>(mg/kg bw (per day)) | Study                  | Uncertainty factor |
|--------------------------------------------------|-------------------------------|------------------------|--------------------|
| Acceptable Daily Intake (ADI)                    | 0.5                           | rat, developmental     | 600*               |
| Acute Reference Dose (ARfD)                      | -                             | Not required           | -                  |
| Acceptable Operator Exposure Level (AOEL)        | 0.27                          | 5-day inhalation study | 100                |
| Acceptable Operator Exposure Level (AOEC)        | 1.39 mg/m <sup>3</sup>        | 5-day inhalation study | 100                |
| Acute Acceptable Operator Exposure Level (AAOEL) | 0.27                          | 5-day inhalation study | 100                |
| Acute Acceptable Operator Exposure Level (AAOEC) | 1.39 mg/m <sup>3</sup>        | 5-day inhalation study | 100                |

\*UF of 600 to account for subacute to chronic exposure extrapolation.

**Dermal absorption (Regulation (EU) N° 284/2013, Annex Part A, point 7.3)**

Representative formulation (*indicate name, type e.g. EC and concentration of active substance*)

Concentrate: 25 % (no study, default value)  
Spray dilution: Not applicable

<sup>3</sup> If available include also reference values for metabolites

**Exposure scenarios (Regulation (EU) N° 284/2013, Annex Part A, point 7.2)**

| Operators                      | <p>Use: hot fogging concentrate (HN) an application rate of 112 grams a.s./tonne (treating a large warehouse containing 2000 tonnes of potatoes)</p> <p><u>Exposure estimates:</u></p> <p>(RISKOFDERM, 95<sup>th</sup> centile): %AAOEL</p> <p>Hand exposure without PPE: 72</p> <p>Inhalation exposure: no data, use of RPE</p> <p>(RISKOFDERM, 75<sup>th</sup> centile): %AOEL</p> <p>Hand exposure without PPE: 14</p> <p>Inhalation exposure: no data, use of RPE</p>                                                                                                                                                                |                                |       |                   |      |                         |      |             |      |          |       |     |      |
|--------------------------------|------------------------------------------------------------------------------------------------------------------------------------------------------------------------------------------------------------------------------------------------------------------------------------------------------------------------------------------------------------------------------------------------------------------------------------------------------------------------------------------------------------------------------------------------------------------------------------------------------------------------------------------|--------------------------------|-------|-------------------|------|-------------------------|------|-------------|------|----------|-------|-----|------|
| Workers                        | <p>Crop inspection (24 hours ventilation prior to entry):</p> <p><u>Exposure estimates:</u> (field study) % of AOEL</p> <table border="1"> <tr> <td>Without PPE</td> <td>127</td> </tr> <tr> <td>With PPE (gloves)</td> <td>95.5</td> </tr> <tr> <td>With PPE (gloves) + RPE</td> <td>12.7</td> </tr> </table> <p>Removal of potatoes (mechanical activity, re-entry interval 14 days, 24 hours ventilation prior to entry, work duration of 2 hours):</p> <p><u>Exposure estimates:</u> (field study) % of AOEL</p> <table border="1"> <tr> <td>Without RPE</td> <td>98.8</td> </tr> <tr> <td>With RPE</td> <td>9.9</td> </tr> </table> | Without PPE                    | 127   | With PPE (gloves) | 95.5 | With PPE (gloves) + RPE | 12.7 | Without RPE | 98.8 | With RPE | 9.9   |     |      |
| Without PPE                    | 127                                                                                                                                                                                                                                                                                                                                                                                                                                                                                                                                                                                                                                      |                                |       |                   |      |                         |      |             |      |          |       |     |      |
| With PPE (gloves)              | 95.5                                                                                                                                                                                                                                                                                                                                                                                                                                                                                                                                                                                                                                     |                                |       |                   |      |                         |      |             |      |          |       |     |      |
| With PPE (gloves) + RPE        | 12.7                                                                                                                                                                                                                                                                                                                                                                                                                                                                                                                                                                                                                                     |                                |       |                   |      |                         |      |             |      |          |       |     |      |
| Without RPE                    | 98.8                                                                                                                                                                                                                                                                                                                                                                                                                                                                                                                                                                                                                                     |                                |       |                   |      |                         |      |             |      |          |       |     |      |
| With RPE                       | 9.9                                                                                                                                                                                                                                                                                                                                                                                                                                                                                                                                                                                                                                      |                                |       |                   |      |                         |      |             |      |          |       |     |      |
| Bystanders and residents       | <p>Exposure estimates based on air monitoring study (maximum values in % of AOEL):</p> <table border="1"> <thead> <tr> <th>Distance from storage facility</th> <th>Adult</th> <th>Child</th> </tr> </thead> <tbody> <tr> <td>10 m</td> <td>52</td> <td>249</td> </tr> <tr> <td>50-80 m</td> <td>1.5</td> <td>7.2</td> </tr> <tr> <td>100 m</td> <td>2.8</td> <td>13.4</td> </tr> </tbody> </table>                                                                                                                                                                                                                                       | Distance from storage facility | Adult | Child             | 10 m | 52                      | 249  | 50-80 m     | 1.5  | 7.2      | 100 m | 2.8 | 13.4 |
| Distance from storage facility | Adult                                                                                                                                                                                                                                                                                                                                                                                                                                                                                                                                                                                                                                    | Child                          |       |                   |      |                         |      |             |      |          |       |     |      |
| 10 m                           | 52                                                                                                                                                                                                                                                                                                                                                                                                                                                                                                                                                                                                                                       | 249                            |       |                   |      |                         |      |             |      |          |       |     |      |
| 50-80 m                        | 1.5                                                                                                                                                                                                                                                                                                                                                                                                                                                                                                                                                                                                                                      | 7.2                            |       |                   |      |                         |      |             |      |          |       |     |      |
| 100 m                          | 2.8                                                                                                                                                                                                                                                                                                                                                                                                                                                                                                                                                                                                                                      | 13.4                           |       |                   |      |                         |      |             |      |          |       |     |      |

**Classification with regard to toxicological data (Regulation (EU) N° 283/2013, Annex Part A, Section 10)**

|                                                                                                                                                                                                |                                                                                                                                                                       |
|------------------------------------------------------------------------------------------------------------------------------------------------------------------------------------------------|-----------------------------------------------------------------------------------------------------------------------------------------------------------------------|
| Substance:                                                                                                                                                                                     | (3E)-dec-3-en-2-one                                                                                                                                                   |
| Harmonised classification according to Regulation (EC) No 1272/2008 and its Adaptations to Technical Process [Table 3.1 of Annex VI of Regulation (EC) No 1272/2008 as amended] <sup>4</sup> : | <p>No current harmonised classification</p> <p>RAC Opinion (2022):</p> <p>Skin Irrit. 2: H315 Causes skin irritation</p> <p>Acute Tox. 4: H332 Harmful if inhaled</p> |

<sup>4</sup> Regulation (EC) No 1272/2008 of the European Parliament and of the Council of 16 December 2008 on classification, labelling and packaging of substances and mixtures, amending and repealing Directives 67/548/EEC and 1999/45/EC, and amending Regulation (EC) No 1907/2006. OJ L 353, 31.12.2008, 1-1355.

According to the peer review, criteria for harmonised classification according to Regulation (EC) No 1272/2008 may be met for:

See box above

## Residues in or on treated products food and feed

## Metabolism in plants (Regulation (EU) N° 283/2013, Annex Part A, points 6.2.1, 6.5.1, 6.6.1 and 6.7.1)

|                                                                                                                                                                                                                                                                                                                                                                                                                                                                                                                                                                                                                                                                                                                                                                                                                                                                                                                                                                                                                                                                                                                                                                                                                                                                                                                                                                                                                                                                                                                                                                                                                                                                                                            |                                                                                       |                     |                                                    |                      |
|------------------------------------------------------------------------------------------------------------------------------------------------------------------------------------------------------------------------------------------------------------------------------------------------------------------------------------------------------------------------------------------------------------------------------------------------------------------------------------------------------------------------------------------------------------------------------------------------------------------------------------------------------------------------------------------------------------------------------------------------------------------------------------------------------------------------------------------------------------------------------------------------------------------------------------------------------------------------------------------------------------------------------------------------------------------------------------------------------------------------------------------------------------------------------------------------------------------------------------------------------------------------------------------------------------------------------------------------------------------------------------------------------------------------------------------------------------------------------------------------------------------------------------------------------------------------------------------------------------------------------------------------------------------------------------------------------------|---------------------------------------------------------------------------------------|---------------------|----------------------------------------------------|----------------------|
| <b>Primary crops</b><br>(Plant groups covered)<br><b>OECD Guideline 501</b>                                                                                                                                                                                                                                                                                                                                                                                                                                                                                                                                                                                                                                                                                                                                                                                                                                                                                                                                                                                                                                                                                                                                                                                                                                                                                                                                                                                                                                                                                                                                                                                                                                | <b>Crop groups</b>                                                                    | <b>Crop(s)</b>      | <b>Application(s)</b>                              | <b>DAT</b><br>(days) |
|                                                                                                                                                                                                                                                                                                                                                                                                                                                                                                                                                                                                                                                                                                                                                                                                                                                                                                                                                                                                                                                                                                                                                                                                                                                                                                                                                                                                                                                                                                                                                                                                                                                                                                            | Fruit crops                                                                           |                     |                                                    |                      |
|                                                                                                                                                                                                                                                                                                                                                                                                                                                                                                                                                                                                                                                                                                                                                                                                                                                                                                                                                                                                                                                                                                                                                                                                                                                                                                                                                                                                                                                                                                                                                                                                                                                                                                            | Root crops                                                                            | Potato              | 1x 135.0 mg/kg potatoes<br>(post-harvest, fogging) | 1, 7, 14,<br>28      |
|                                                                                                                                                                                                                                                                                                                                                                                                                                                                                                                                                                                                                                                                                                                                                                                                                                                                                                                                                                                                                                                                                                                                                                                                                                                                                                                                                                                                                                                                                                                                                                                                                                                                                                            | Leafy crops                                                                           |                     |                                                    |                      |
|                                                                                                                                                                                                                                                                                                                                                                                                                                                                                                                                                                                                                                                                                                                                                                                                                                                                                                                                                                                                                                                                                                                                                                                                                                                                                                                                                                                                                                                                                                                                                                                                                                                                                                            | Cereals/grass crops                                                                   |                     |                                                    |                      |
|                                                                                                                                                                                                                                                                                                                                                                                                                                                                                                                                                                                                                                                                                                                                                                                                                                                                                                                                                                                                                                                                                                                                                                                                                                                                                                                                                                                                                                                                                                                                                                                                                                                                                                            | Pulses/Oilseeds                                                                       |                     |                                                    |                      |
|                                                                                                                                                                                                                                                                                                                                                                                                                                                                                                                                                                                                                                                                                                                                                                                                                                                                                                                                                                                                                                                                                                                                                                                                                                                                                                                                                                                                                                                                                                                                                                                                                                                                                                            | Miscellaneous                                                                         |                     |                                                    |                      |
| <p>No standard metabolism study with root crops or any other crop group has been submitted. In one scientific publication it has been shown that the metabolites 2-decanone and 2-decanol were detected after treatment with (3E)-dec-3-en-2-one. However, non-volatile compounds were not investigated, and no information is presented whether possible other metabolites have been found. In addition, a mass-balance study has been conducted. The reliability of this study can be questioned, since only 12% of applied radioactivity could be recovered. It was found that extensive metabolism occurred leading to the formation of CO<sub>2</sub>. Besides (3E)-dec-3-en-2-one, 2-decanone and 2-decanol, other residues were present in potato peel in larger quantities, which could be of relevance. In conclusion, it is still unknown whether other relevant metabolites constitute the terminal and major residues after treatment with (3E)-dec-3-en-2-one. Therefore, a data requirement is set for further investigation of metabolites.</p> <p>After the peer review, the applicant submitted a metabolism study with potatoes, treated post-harvest with radiolabelled (3E)-dec-3-en-2-one. This new metabolism study, although not fully guideline-compliant, provides further evidence on the nature of the residues after (3E)-dec-3-en-2-one application (i.e., (3E)-dec-3-en-2-one, 2-decanone, and 2-decanol, including conjugates). A <b>data gap</b> is set for the applicant to undertake all the analytical attempts to characterise and identify the unknown radioactive residues in potato rinse, peel and pulp in order to comply with the current data requirements.</p> |                                                                                       |                     |                                                    |                      |
| <b>Rotational crops</b><br>(metabolic pattern)<br><b>OECD Guideline 502</b>                                                                                                                                                                                                                                                                                                                                                                                                                                                                                                                                                                                                                                                                                                                                                                                                                                                                                                                                                                                                                                                                                                                                                                                                                                                                                                                                                                                                                                                                                                                                                                                                                                | <b>Crop groups</b>                                                                    | <b>Crop(s)</b>      | <b>PBI (days)</b>                                  | <b>Comments</b>      |
|                                                                                                                                                                                                                                                                                                                                                                                                                                                                                                                                                                                                                                                                                                                                                                                                                                                                                                                                                                                                                                                                                                                                                                                                                                                                                                                                                                                                                                                                                                                                                                                                                                                                                                            | Root/tuber crops                                                                      |                     |                                                    |                      |
|                                                                                                                                                                                                                                                                                                                                                                                                                                                                                                                                                                                                                                                                                                                                                                                                                                                                                                                                                                                                                                                                                                                                                                                                                                                                                                                                                                                                                                                                                                                                                                                                                                                                                                            | Leafy crops                                                                           |                     |                                                    |                      |
|                                                                                                                                                                                                                                                                                                                                                                                                                                                                                                                                                                                                                                                                                                                                                                                                                                                                                                                                                                                                                                                                                                                                                                                                                                                                                                                                                                                                                                                                                                                                                                                                                                                                                                            | Cereal (small grain)                                                                  |                     |                                                    |                      |
|                                                                                                                                                                                                                                                                                                                                                                                                                                                                                                                                                                                                                                                                                                                                                                                                                                                                                                                                                                                                                                                                                                                                                                                                                                                                                                                                                                                                                                                                                                                                                                                                                                                                                                            | Other                                                                                 |                     |                                                    |                      |
| Rotational crop and primary crop metabolism similar?                                                                                                                                                                                                                                                                                                                                                                                                                                                                                                                                                                                                                                                                                                                                                                                                                                                                                                                                                                                                                                                                                                                                                                                                                                                                                                                                                                                                                                                                                                                                                                                                                                                       | Rotational crop studies are not required, since it concerns a post-harvest treatment. |                     |                                                    |                      |
| <b>Processed commodities</b><br>(standard hydrolysis study)<br><b>OECD Guideline 507</b>                                                                                                                                                                                                                                                                                                                                                                                                                                                                                                                                                                                                                                                                                                                                                                                                                                                                                                                                                                                                                                                                                                                                                                                                                                                                                                                                                                                                                                                                                                                                                                                                                   | <b>Conditions</b>                                                                     | (3E)-dec-3-en-2-one | Uncharacterized peak                               |                      |
|                                                                                                                                                                                                                                                                                                                                                                                                                                                                                                                                                                                                                                                                                                                                                                                                                                                                                                                                                                                                                                                                                                                                                                                                                                                                                                                                                                                                                                                                                                                                                                                                                                                                                                            | 20 min, 90°C, pH 4                                                                    | 99.9%               | -                                                  |                      |
|                                                                                                                                                                                                                                                                                                                                                                                                                                                                                                                                                                                                                                                                                                                                                                                                                                                                                                                                                                                                                                                                                                                                                                                                                                                                                                                                                                                                                                                                                                                                                                                                                                                                                                            | 60 min, 100°C, pH 5                                                                   | 94.5%               | 1.6%                                               |                      |
|                                                                                                                                                                                                                                                                                                                                                                                                                                                                                                                                                                                                                                                                                                                                                                                                                                                                                                                                                                                                                                                                                                                                                                                                                                                                                                                                                                                                                                                                                                                                                                                                                                                                                                            | 20 min, 120°C, pH 6                                                                   | 93.9%               | 4.1%                                               |                      |
|                                                                                                                                                                                                                                                                                                                                                                                                                                                                                                                                                                                                                                                                                                                                                                                                                                                                                                                                                                                                                                                                                                                                                                                                                                                                                                                                                                                                                                                                                                                                                                                                                                                                                                            |                                                                                       |                     |                                                    |                      |
| Residue pattern in processed commodities similar to residue pattern in raw commodities?                                                                                                                                                                                                                                                                                                                                                                                                                                                                                                                                                                                                                                                                                                                                                                                                                                                                                                                                                                                                                                                                                                                                                                                                                                                                                                                                                                                                                                                                                                                                                                                                                    |                                                                                       |                     |                                                    |                      |



|                                                                                                     |                                                                                                                                                                                                                                                                                                                                                                                 |
|-----------------------------------------------------------------------------------------------------|---------------------------------------------------------------------------------------------------------------------------------------------------------------------------------------------------------------------------------------------------------------------------------------------------------------------------------------------------------------------------------|
| Plant residue definition for monitoring (RD-Mo)<br><b>OECD Guidance, series on pesticides No 31</b> | (3E)-dec-3-en-2-one                                                                                                                                                                                                                                                                                                                                                             |
| Plant residue definition for risk assessment (RD-RA)                                                | Sum of (3E)-dec-3-en-2-one, 2-decanone and 2-decanol (free and conjugated) and 3-decen-2-ol (free and conjugated), expressed as (3E)-dec-3-en-2-one. Provisional (data gap for toxicological properties of 3-decen-2-ol (free and conjugated)).<br><br>The proposed residue definitions are considered provisional and restricted to root crops following treatment in storage. |
| Conversion factor (monitoring to risk assessment)                                                   | Not possible to derive                                                                                                                                                                                                                                                                                                                                                          |

**Metabolism in livestock (Regulation (EU) N° 283/2013, Annex Part A, points 6.2.2, 6.2.3, 6.2.4, 6.2.5 6.7.1)**

| <b>OECD Guideline 503 and SANCO/11187/2013 rev. 3 (fish)</b>                                         | <b>Animal</b>                                                                                             | <b>Dose</b><br>(mg/kg bw/d) | <b>Duration</b><br>(days) | <b>N rate/comment</b> |
|------------------------------------------------------------------------------------------------------|-----------------------------------------------------------------------------------------------------------|-----------------------------|---------------------------|-----------------------|
| <b>Animals covered</b>                                                                               | Laying hen                                                                                                |                             |                           |                       |
|                                                                                                      | Goat/Cow                                                                                                  |                             |                           |                       |
|                                                                                                      | Pig                                                                                                       |                             |                           |                       |
|                                                                                                      | Fish                                                                                                      | mg/kg DM                    |                           |                       |
|                                                                                                      | Data gap for metabolism data in animals and nature and magnitude of residues in fish have been identified |                             |                           |                       |
| Time needed to reach a plateau concentration in milk and eggs (days)                                 | No studies submitted.                                                                                     |                             |                           |                       |
| Animal residue definition for monitoring (RD-Mo)<br><b>OECD Guidance, series on pesticides No 31</b> | Pending data gap for metabolism data.                                                                     |                             |                           |                       |
| Animal residue definition for risk assessment (RD-RA)                                                | Pending data gap for metabolism data.                                                                     |                             |                           |                       |
| Conversion factor (monitoring to risk assessment)                                                    | Pending data gap for metabolism data.                                                                     |                             |                           |                       |
| Metabolism in rat and ruminant similar (Yes/No)                                                      | Not applicable                                                                                            |                             |                           |                       |
| Fat soluble residues (Yes/No)<br><b>(FAO, 2009)</b>                                                  | (3E)-dec-3-en-2-one: fat soluble<br>2-decanol and 2-decanone: fat soluble                                 |                             |                           |                       |

**Residues in succeeding crops (Regulation (EU) N° 283/2013, Annex Part A, point 6.6.2)**

**Confined rotational crop study**  
(Quantitative aspect)  
**OECD Guideline 502**

Rotational crop studies are not required, since it concerns a post-harvest treatment.

**Field rotational crop study**  
**OECD Guideline 504**

Rotational crop studies are not required, since it concerns a post-harvest treatment.

**Stability of residues (Regulation (EU) N° 283/2013, Annex Part A, point 6.1)  
OECD Guideline 506**

| Plant products<br>(Category)                                                                                                                                                                                                                                                                                                                                                                                                              | Commodity        | T<br>(°C) | Stability (Month/Year) |  |  |  |
|-------------------------------------------------------------------------------------------------------------------------------------------------------------------------------------------------------------------------------------------------------------------------------------------------------------------------------------------------------------------------------------------------------------------------------------------|------------------|-----------|------------------------|--|--|--|
|                                                                                                                                                                                                                                                                                                                                                                                                                                           |                  |           |                        |  |  |  |
| High water content                                                                                                                                                                                                                                                                                                                                                                                                                        |                  |           |                        |  |  |  |
| High oil content                                                                                                                                                                                                                                                                                                                                                                                                                          |                  |           |                        |  |  |  |
| High protein content                                                                                                                                                                                                                                                                                                                                                                                                                      |                  |           |                        |  |  |  |
| High starch content                                                                                                                                                                                                                                                                                                                                                                                                                       |                  |           |                        |  |  |  |
| High acid content                                                                                                                                                                                                                                                                                                                                                                                                                         |                  |           |                        |  |  |  |
| No storage stability data submitted. In the available trials, extra care was taken to avoid any loss of residue during sampling and transport. In addition, duplicate analyses of raw tuber tissue collected in the third supervised residue trial, frozen 1 day after treatment and then stored frozen at -80°C for 11 days and 32 days showed reasonable recoveries for all 3 analytes ((3E)-dec-3-en-2-one, 2-decanone and 2-decanol). |                  |           |                        |  |  |  |
| Animal                                                                                                                                                                                                                                                                                                                                                                                                                                    | Animal commodity | T<br>(°C) | Stability (Month/Year) |  |  |  |
|                                                                                                                                                                                                                                                                                                                                                                                                                                           |                  |           |                        |  |  |  |
|                                                                                                                                                                                                                                                                                                                                                                                                                                           | Muscle           |           |                        |  |  |  |
|                                                                                                                                                                                                                                                                                                                                                                                                                                           | Liver            |           |                        |  |  |  |
|                                                                                                                                                                                                                                                                                                                                                                                                                                           | Kidney           |           |                        |  |  |  |
|                                                                                                                                                                                                                                                                                                                                                                                                                                           | Milk             |           |                        |  |  |  |
|                                                                                                                                                                                                                                                                                                                                                                                                                                           | Egg              |           |                        |  |  |  |
| No studies submitted.                                                                                                                                                                                                                                                                                                                                                                                                                     |                  |           |                        |  |  |  |

**Summary of residues data from the supervised residue trials (Regulation (EU) N° 283/2013, Annex Part A, point 6.3) OECD Guideline 509, OECD Guidance, series on pesticides No 66 and OECD MRL calculator**

| Crop                       | Region/<br>Indoor<br>(a) | Residue levels (mg/kg) observed in the supervised residue trials relevant to the supported GAPs<br>(b)                                                | Recommendations/comments<br>(OECD calculations)                                                                                                                                                                                                                                                                                                                                                                                                                                                                                                                                                                                                      | MRL proposals<br>(mg/kg) | HR<br>(mg/kg)<br>(c) | STMR<br>(mg/kg)<br>(d) |
|----------------------------|--------------------------|-------------------------------------------------------------------------------------------------------------------------------------------------------|------------------------------------------------------------------------------------------------------------------------------------------------------------------------------------------------------------------------------------------------------------------------------------------------------------------------------------------------------------------------------------------------------------------------------------------------------------------------------------------------------------------------------------------------------------------------------------------------------------------------------------------------------|--------------------------|----------------------|------------------------|
| <b>Representative uses</b> |                          |                                                                                                                                                       |                                                                                                                                                                                                                                                                                                                                                                                                                                                                                                                                                                                                                                                      |                          |                      |                        |
| Potatoes                   | Indoor                   | (3E)-dec-3-en-2-one: 0.067; 0.216; 1.5; 2.4; 3.3 mg/kg<br>2-decanone: 0.099; 0.259; 1.2; 1.7; 2.7 mg/kg<br>2-decanol: 1.4; 2.784; 2.3; 3.3; 4.9 mg/kg | <p>According to the residue definition for risk assessment ‘sum of (3E)-dec-3-en-2-one, 2-decanone and 2-decanol, expressed as (3E)-dec-3-en-2-one’: 1.53; 3.18; 4.9; 8.2; 9.8 mg/kg.</p> <p>During the expert meeting (Pesticide Peer Review TC76 (04 – 05 May 2022)), a data gap was set for a complete dataset of eight GAP-compliant residue trials analysing for all the compounds in compliance with the residue definitions for monitoring and risk assessment once the residue definition for risk assessment is finalised and considering specifically the precautionary measures to avoid volatilization and storage stability issues.</p> | Not required             | 9.8                  | 4.9                    |

- (a): **NEU** or **SEU** for northern or southern **outdoor** trials in EU member states (**N+SEU** if both zones), **Indoor** for glasshouse/protected crops, **Country** if non-EU location.
- (b): Residue levels in trials conducted according to GAP reported in ascending order (*e.g.* 3x <0.01, 0.01, 6x 0.02, 0.04, 0.08, 3x 0.10, 2x 0.15, 0.17). When residue definition for monitoring and risk assessment differs, use **Mo/RA** to differentiate data expressed according to the residue definition for **Monitoring** and **Risk Assessment**.
- (c): **HR**: Highest residue. When residue definition for monitoring and risk assessment differs, HR according to residue definition for monitoring reported in brackets (HR<sub>Mo</sub>).
- (d): **STMR**: Supervised Trials Median Residue. When residue definition for monitoring and risk assessment differs, STMR according to definition for monitoring reported in brackets (STMR<sub>Mo</sub>).

Inputs for animal burden calculations according to the residue definition ‘sum of (3E)-dec-3-en-2-one, 2-decanone and 2-decanol, expressed as (3E)-dec-3-en-2-one’

| Feed commodity                                                                                                                                                                                                                                                                         | Median dietary burden |                       | Maximum dietary burden |         |
|----------------------------------------------------------------------------------------------------------------------------------------------------------------------------------------------------------------------------------------------------------------------------------------|-----------------------|-----------------------|------------------------|---------|
|                                                                                                                                                                                                                                                                                        | (mg/kg)               | Comment               | (mg/kg)                | Comment |
| <b>Representative uses</b>                                                                                                                                                                                                                                                             |                       |                       |                        |         |
| Potato culls                                                                                                                                                                                                                                                                           | 4.9                   | STMR                  | 9.8                    | HR      |
| Potato, process waste                                                                                                                                                                                                                                                                  | 98                    | STMR*20 (=default PF) | n.a.                   |         |
| Potato, dried pulp                                                                                                                                                                                                                                                                     | 186                   | STMR*38 (=default PF) | n.a.                   |         |
| Input is based on provisionally acceptable residue data but should be revised according to the agreed RDs for potatoes, the submission of the requested residue trials and the toxicity of the metabolite 3-decen-2-ol (free and conjugated) once these data are available (data gap). |                       |                       |                        |         |

**Residues from livestock feeding studies (Regulation (EU) N° 283/2013, Annex Part A, points 6.4.1, 6.4.2, 6.4.3 and 6.4.4) according to the residue definition ‘sum of (3E)-dec-3-en-2-one, 2-decanone and 2-decanol, expressed as (3E)-dec-3-en-2-one ‘ OECD Guideline 505 and OECD Guidance, series on pesticides No 73**

**MRL calculations**

**Highest expected intake**

(mg/kg bw/d)

(mg/kg DM for fish)

Intake >0.004 mg/kg bw

Feeding study submitted

**Representative feeding level (mg/kg bw/d, mg/kg DM for fish) and N rates**

Muscle

Fat

Meat<sup>(b)</sup>

Liver

Kidney

Milk<sup>(a)</sup>

Eggs

Method of calculation<sup>(c)</sup>

|                                      | Ruminant                          |                     |                                   |                   | Pig/Swine                         |                        | Poultry                           |                           | Fish                              |                      |
|--------------------------------------|-----------------------------------|---------------------|-----------------------------------|-------------------|-----------------------------------|------------------------|-----------------------------------|---------------------------|-----------------------------------|----------------------|
| Beef cattle                          | 8.193                             | Ram/Ewe             | 11.379                            | Breeding          | 4.335                             | Broiler                | 3.333                             | Carp                      | 0.165                             |                      |
| Dairy cattle                         | 9.988                             | Lamb                | 7.358                             | Finishing         | 2.005                             | Layer                  | 2.507                             | Trout                     | 0                                 |                      |
|                                      |                                   |                     |                                   |                   |                                   | Turkey                 | 0.700                             | Fish intake >0.1 mg/kg DM |                                   |                      |
| Intake >0.004 mg/kg bw               | Yes                               |                     | Yes                               |                   | Yes                               |                        | Yes                               |                           | Yes                               |                      |
| Feeding study submitted              | Not required                      |                     | Not required                      |                   | Not required                      |                        | Not required                      |                           | Not required                      |                      |
|                                      | Level                             | Beef: N<br>Dairy: N | Level                             | Lamb: N<br>Ewe: N | Level                             | N rate<br>Breed/Finish | Level                             | B or T: N<br>Layer: N     | Level                             | N rate<br>Carp/Trout |
|                                      | Estimated HR <sup>(a)</sup> at 1N | MRL proposals       | Estimated HR <sup>(a)</sup> at 1N | MRL proposals     | Estimated HR <sup>(a)</sup> at 1N | MRL proposals          | Estimated HR <sup>(a)</sup> at 1N | MRL proposals             | Estimated HR <sup>(a)</sup> at 1N | MRL proposals        |
| Muscle                               |                                   |                     |                                   |                   |                                   |                        |                                   |                           |                                   |                      |
| Fat                                  |                                   |                     |                                   |                   |                                   |                        |                                   |                           |                                   |                      |
| Meat <sup>(b)</sup>                  |                                   |                     |                                   |                   |                                   |                        |                                   |                           |                                   |                      |
| Liver                                |                                   |                     |                                   |                   |                                   |                        |                                   |                           |                                   |                      |
| Kidney                               |                                   |                     |                                   |                   |                                   |                        |                                   |                           |                                   |                      |
| Milk <sup>(a)</sup>                  |                                   |                     |                                   |                   |                                   |                        |                                   |                           |                                   |                      |
| Eggs                                 |                                   |                     |                                   |                   |                                   |                        |                                   |                           |                                   |                      |
| Method of calculation <sup>(c)</sup> |                                   |                     |                                   |                   |                                   |                        |                                   |                           |                                   |                      |

<sup>(a)</sup>: Estimated HR calculated at 1N level (**estimated mean level for milk**).

<sup>(b)</sup>: HR in meat calculated for mammalian on the basis of 20% fat + 80% muscle and 10% fat + 90% muscle for poultry

<sup>(c)</sup>: The OECD guidance document on residues in livestock (series on pesticides 73) recommends three different approaches to derive MRLs for animal products; by applying a transfer factor (Tf), by intrapolation (It) or by linear regression (Ln). Fill in method(s) considered to derive the MRL proposals.

| STMR calculations                                                                      | Ruminant                                                             |                                            |                             |                                            | Pig/Swine                   |                                            | Poultry                     |                                            | Fish                        |                                            |
|----------------------------------------------------------------------------------------|----------------------------------------------------------------------|--------------------------------------------|-----------------------------|--------------------------------------------|-----------------------------|--------------------------------------------|-----------------------------|--------------------------------------------|-----------------------------|--------------------------------------------|
|                                                                                        | <b>Median expected intake</b><br>(mg/kg bw/d)<br>(mg/kg DM for fish) | Beef cattle                                | 8.0164                      | Ram/Ewe                                    | 11.1339                     | Breeding                                   | 4.052                       | Broiler                                    | 3.160                       | Carp                                       |
|                                                                                        | Dairy cattle                                                         | 9.7058                                     | Lamb                        | 7.1499                                     | Finishing                   | 1.637                                      | Layer                       | 2.339                                      | Trout                       | 0                                          |
|                                                                                        |                                                                      |                                            |                             |                                            |                             |                                            | Turkey                      | 0.350                                      |                             |                                            |
| <b>Representative feeding level</b> (mg/kg bw/d, mg/kg DM for fish) and <b>N rates</b> | Level                                                                | Beef: N<br>Dairy: N                        | Level                       | Lamb: N<br>Ewe: N                          | Level                       | N rate<br>Breed/Finish                     | Level                       | B or T: N<br>Layer: N                      | Level                       | N rate<br>Carp/Trout                       |
|                                                                                        | Mean level in feeding level                                          | Estimated <b>STMR</b> <sup>(b)</sup> at 1N | Mean level in feeding level | Estimated <b>STMR</b> <sup>(b)</sup> at 1N | Mean level in feeding level | Estimated <b>STMR</b> <sup>(b)</sup> at 1N | Mean level in feeding level | Estimated <b>STMR</b> <sup>(b)</sup> at 1N | Mean level in feeding level | Estimated <b>STMR</b> <sup>(b)</sup> at 1N |
| Muscle                                                                                 |                                                                      |                                            |                             |                                            |                             |                                            |                             |                                            |                             |                                            |
| Fat                                                                                    |                                                                      |                                            |                             |                                            |                             |                                            |                             |                                            |                             |                                            |
| Meat <sup>(a)</sup>                                                                    |                                                                      |                                            |                             |                                            |                             |                                            |                             |                                            |                             |                                            |
| Liver                                                                                  |                                                                      |                                            |                             |                                            |                             |                                            |                             |                                            |                             |                                            |
| Kidney                                                                                 |                                                                      |                                            |                             |                                            |                             |                                            |                             |                                            |                             |                                            |
| Milk                                                                                   |                                                                      |                                            |                             |                                            |                             |                                            |                             |                                            |                             |                                            |
| Eggs                                                                                   |                                                                      |                                            |                             |                                            |                             |                                            |                             |                                            |                             |                                            |
| Method of calculation <sup>(c)</sup>                                                   |                                                                      |                                            |                             |                                            |                             |                                            |                             |                                            |                             |                                            |

<sup>(a)</sup>: STMR in meat calculated for mammalian on the basis of 20% fat + 80% muscle and 10% fat + 90% muscle for poultry

<sup>(b)</sup>: When the mean level is set at the LOQ, the STMR is set at the LOQ.

<sup>(c)</sup>: The OECD guidance document on residues in livestock (series on pesticide 73) recommends three different approaches to derive MRLs for animal products; by applying a transfer factor (Tf), by interpolation (It) or by linear regression (Ln). Fill in method(s) considered to derive the MRL proposals.

## Conversion Factors (CF) for monitoring to risk assessment

### Animal products

Not relevant

### Plant products

Not relevant

### Processing factors (Regulation (EU) N° 283/2013, Annex Part A, points 6.5.2 and 6.5.3) OECD Guideline 508 and OECD Guidance, series on testing and assessment No 96

No sufficient processing studies to proposed reliable processing factors (data gap)

| Crop (RAC)/Edible part or Crop (RAC)/Processed product         | Number of studies <sup>(a)</sup> | Processing Factor (PF)                                              |           | Conversion Factor (CF <sub>P</sub> ) for RA <sup>(b)</sup> |
|----------------------------------------------------------------|----------------------------------|---------------------------------------------------------------------|-----------|------------------------------------------------------------|
|                                                                |                                  | Individual values                                                   | Median PF |                                                            |
| <b>Representative uses</b> (row to be deleted if not relevant) |                                  |                                                                     |           |                                                            |
| Potato, baking                                                 | 1                                | 0.45 ((3E)-dec-3-en-2-one)<br>0.81 (2-decanone)<br>0.34 (2-decanol) |           |                                                            |
| Potato, steaming                                               | 1                                | 0.22 ((3E)-dec-3-en-2-one)<br>0.83 (2-decanone)<br>0.38 (2-decanol) |           |                                                            |

<sup>(a)</sup>: Studies with residues in the RAC at or close to the LOQ should be disregarded (unless concentration)

<sup>(b)</sup>: When the residue definition for risk assessment differs from the residue definition for monitoring

### Consumer risk assessment (Regulation (EU) N° 283/2013, Annex Part A, point 6.9) Including all uses (representative uses and uses related to an MRL application).

Provisional consumer risk assessment is presented. However, consumers risk assessment is considered as not finalised pending the data gaps identified during the peer review.

#### ADI

1 mg/kg bw per day (sum of (3E)-dec-3-en-2-one, 2-decanone and 2-decanol, expressed as (3E)-dec-3-en-2-one)

TMDI according to EFSA PRIMo 3.1

Highest TMDI: 5 % ADI (PT general)

NTMDI, according to (to be specified)

Highest NTMDI: XX % ADI (MS, diet)

IEDI (% ADI), according to EFSA PRIMo

Highest IEDI: XX % ADI (MS, diet)

NEDI (% ADI), according to (to be specified)

Highest NEDI: XX % ADI (MS, diet)

Factors included in the calculations

Provisional STMR for potatoes

#### ARfD

Not applicable

IESTI (% ARfD), according to EFSA PRIMo 3.1

Not required

NESTI (% ARfD), according to (to be specified)

Highest NESTI: XX % ARfD (commodity)

Factors included in IESTI and NESTI

**Additional contribution to the consumer intakes through drinking water resulting from groundwater metabolite(s) expected to be present above 0.75 µg/L**

**Not applicable**

Metabolite(s)

ADI (mg/kg bw per day)

Intake of groundwater metabolites (% ADI)

**WHO Guideline (WHO, 2009)**

|                            |          |
|----------------------------|----------|
|                            |          |
|                            |          |
| Adult (60 kg bw, 2 L):     | XX % ADI |
| Child (10 kg bw, 1 L):     | XX % ADI |
| Infant ( 5 kg bw, 0.75 L): | XX % ADI |

**Proposed MRLs (Regulation (EU) No 283/2013, Annex Part A, points 6.7.2 and 6.7.3)**

| Code <sup>(a)</sup>                                            | Commodity/Group | MRL/Import tolerance <sup>(b)</sup> (mg/kg) and Comments |                                                                            |
|----------------------------------------------------------------|-----------------|----------------------------------------------------------|----------------------------------------------------------------------------|
| <b>Plant commodities</b>                                       |                 |                                                          |                                                                            |
| <b>Representative uses</b> (row to be deleted if not relevant) |                 |                                                          |                                                                            |
|                                                                | Potatoes        | Pending data gaps identified                             | The criteria for inclusion into Annex IV of Reg. (EC) 396/2005 are not met |

(a): Commodity code number, as listed in Annex I of Regulation (EC) No 396/2005

(b): MRLs proposed at the LOQ, should be annotated by an asterisk (\*) after the figure.



**Environmental fate and behaviour****Route of degradation (aerobic) in soil (Regulation (EU) N° 283/2013, Annex Part A, point 7.1.1.1)**

|                                                                                                  |                                                            |
|--------------------------------------------------------------------------------------------------|------------------------------------------------------------|
| Mineralisation after 100 days                                                                    | <i>Not reported, not deemed necessary</i>                  |
| Non-extractable residues after 100 days                                                          | <i>Not reported, not deemed necessary</i>                  |
| Metabolites requiring further consideration - name and/or code, % of applied (range and maximum) | <i>No range and maximum reported, not deemed necessary</i> |

**Route of degradation (anaerobic) in soil (Regulation (EU) N° 283/2013, Annex Part A, point 7.1.1.2)**

|                                                                                                                             |                                           |
|-----------------------------------------------------------------------------------------------------------------------------|-------------------------------------------|
| Mineralisation after 100 days                                                                                               | <i>Not reported, not deemed necessary</i> |
| Non-extractable residues after 100 days                                                                                     | <i>Not reported, not deemed necessary</i> |
| Metabolites that may require further consideration for risk assessment - name and/or code, % of applied (range and maximum) | <i>Not reported, not deemed necessary</i> |

**Route of degradation (photolysis) on soil (Regulation (EU) N° 283/2013, Annex Part A, point 7.1.1.3)**

|                                                                                                                             |                                                                           |
|-----------------------------------------------------------------------------------------------------------------------------|---------------------------------------------------------------------------|
| Metabolites that may require further consideration for risk assessment - name and/or code, % of applied (range and maximum) | <i>Not reported, not deemed necessary, given the proposed use pattern</i> |
| Mineralisation at study end                                                                                                 | <i>Not reported, not deemed necessary, given the proposed use pattern</i> |
| Non-extractable residues at study end                                                                                       | <i>Not reported, not deemed necessary, given the proposed use pattern</i> |

**Rate of degradation in soil (aerobic) laboratory studies active substance (Regulation (EU) N° 283/2013, Annex Part A, point 7.1.2.1.1 and Regulation (EU) N° 284/2013, Annex Part A, point 9.1.1.1)**

| Parent | Dark aerobic conditions |                |                  |                |                                        |                                                    |                       |                                   |
|--------|-------------------------|----------------|------------------|----------------|----------------------------------------|----------------------------------------------------|-----------------------|-----------------------------------|
|        | Soil type               | X <sup>5</sup> | pH <sup>a)</sup> | t. °C / % MWHC | DT <sub>50</sub> /DT <sub>90</sub> (d) | DT <sub>50</sub> (d) 20 °C pF2/10kPa <sup>b)</sup> | St. (χ <sup>2</sup> ) | Method of calculation             |
| n.a.   |                         |                |                  |                | 90                                     | 42.2                                               |                       | TGD – Part II, 2003 <sup>a)</sup> |

|                                      |  |  |  |  |      |  |  |
|--------------------------------------|--|--|--|--|------|--|--|
| -                                    |  |  |  |  |      |  |  |
| -                                    |  |  |  |  |      |  |  |
| -                                    |  |  |  |  |      |  |  |
| Geometric mean (if not pH dependent) |  |  |  |  | 42.2 |  |  |
| pH dependence, <i>No</i>             |  |  |  |  |      |  |  |

<sup>a)</sup>This value is determined based on the ready biodegradability test results and substance properties and Table 8 in the Technical Guidance Document on Risk Assessment – Part II (EU, 2003)

**Rate of degradation in soil (aerobic) laboratory studies transformation products (Regulation (EU) N° 283/2013, Annex Part A, point 7.1.2.1.2 and Regulation (EU) N° 284/2013, Annex Part A, point 9.1.1.1)**

Not applicable/relevant

**Rate of degradation field soil dissipation studies (Regulation (EU) N° 283/2013, Annex Part A, point 7.1.2.2.1 and Regulation (EU) N° 284/2013, Annex Part A, point 9.1.1.2.1)**

Not applicable/relevant

**Combined laboratory and field kinetic endpoints for modelling (when not from different populations)**

Not applicable/relevant

**Soil accumulation (Regulation (EU) N° 283/2013, Annex Part A, point 7.1.2.2.2 and Regulation (EU) N° 284/2013, Annex Part A, point 9.1.1.2.2)**

Soil accumulation and plateau concentration

Not reported. Not needed.

**Rate of degradation in soil (anaerobic) laboratory studies active substance (Regulation (EU) N° 283/2013, Annex Part A, point 7.1.2.1.3 and Regulation (EU) N° 284/2013, Annex Part A, point 9.1.1.1)**

Not applicable/relevant

**Rate of degradation in soil (anaerobic) laboratory studies transformation products (Regulation (EU) N° 283/2013, Annex Part A, point 7.1.2.1.4 and Regulation (EU) N° 284/2013, Annex Part A, point 9.1.1.1)**

Not applicable/relevant

**Rate of degradation on soil (photolysis) laboratory active substance (Regulation (EU) N° 283/2013, Annex Part A, point 7.1.1.3)**

Not applicable/relevant

**Soil adsorption active substance (Regulation (EU) N° 283/2013, Annex Part A, point 7.1.3.1.1 and Regulation (EU) N° 284/2013, Annex Part A, point 9.1.2.1)**

| Parent                                     |      |                       |                       |                         |                       |                         |     |
|--------------------------------------------|------|-----------------------|-----------------------|-------------------------|-----------------------|-------------------------|-----|
| Soil Type                                  | OC % | Soil pH <sup>a)</sup> | K <sub>d</sub> (mL/g) | K <sub>doc</sub> (mL/g) | K <sub>F</sub> (mL/g) | K <sub>Foc</sub> (mL/g) | 1/n |
| <i>n.a. (QSAR – Episuite MCI method)</i>   |      |                       |                       |                         |                       | 165.2                   | 1   |
| <i>n.a. (QSAR – Episuite Kow method)</i>   |      |                       |                       |                         |                       | 1069                    |     |
| <i>n.a. (QSAR- USES (based on logKow))</i> |      |                       |                       |                         |                       | 785                     |     |
|                                            |      |                       |                       |                         |                       |                         |     |
| Geometric mean (if not pH dependent)*      |      |                       |                       |                         |                       | *                       |     |
| Arithmetic mean (if not pH dependent)      |      |                       |                       |                         |                       |                         |     |
| pH dependence, <i>No</i>                   |      |                       |                       |                         |                       |                         |     |

\* For modelling most conservative value of range is used.

**Soil adsorption transformation products (Regulation (EU) N° 283/2013, Annex Part A, point 7.1.3.1.2 and Regulation (EU) N° 284/2013, Annex Part A, point 9.1.2.1)**

Not applicable/relevant

**Mobility in soil column leaching active substance (Regulation (EU) N° 283/2013, Annex Part A, point 7.1.4.1.1 and Regulation (EU) N° 284/2013, Annex Part A, point 9.1.2.1)**

Not applicable/relevant

**Mobility in soil column leaching transformation products (Regulation (EU) N° 283/2013, Annex Part A, point 7.1.4.1.2 and Regulation (EU) N° 284/2013, Annex Part A, point 9.1.2.1)**

Not applicable/relevant

**Lysimeter / field leaching studies (Regulation (EU) N° 283/2013, Annex Part A, points 7.1.4.2 / 7.1.4.3 and Regulation (EU) N° 284/2013, Annex Part A, points 9.1.2.2 / 9.1.2.3)**

Not applicable/relevant

**Hydrolytic degradation (Regulation (EU) N° 283/2013, Annex Part A, point 7.2.1.1)**

Hydrolytic degradation of the active substance and metabolites &gt; 10 %

(3E)-dec-3-en-2-one will be stable to hydrolysis at 20°C and pH 4, 7 &amp; 9.

**Aqueous photochemical degradation (Regulation (EU) N° 283/2013, Annex Part A, points 7.2.1.2 / 7.2.1.3)**

Photolytic degradation of active substance and metabolites above 10 %

(3E)-dec-3-en-2-one does not show any appreciable absorption above 270 nm and photodegradation will therefore not constitute a significant route of degradation/dissipation in the aquatic environment

Quantum yield of direct phototransformation in water at  $\lambda > 290$  nm

-

**'Ready biodegradability' (Regulation (EU) N° 283/2013, Annex Part A, point 7.2.2.1)**

Readily biodegradable (yes/no)

Yes, failing the 10 days window.

**Aerobic mineralisation in surface water (Regulation (EU) N° 283/2013, Annex Part A, point 7.2.2.2 and Regulation (EU) N° 284/2013, Annex Part A, point 9.2.1)**

Not applicable/relevant

**Water / sediment study (Regulation (EU) N° 283/2013, Annex Part A, point 7.2.2.3 and Regulation (EU) N° 284/2013, Annex Part A, point 9.2.2)**

| Parent                  | Distribution (e.g. max in water x after n d. Max. sed x % after n d) |        |       |                                               |                  |                                          |                  |                                        |                  |                                   |
|-------------------------|----------------------------------------------------------------------|--------|-------|-----------------------------------------------|------------------|------------------------------------------|------------------|----------------------------------------|------------------|-----------------------------------|
| Water / sediment system | pH water phase                                                       | pH sed | t. °C | DT <sub>50</sub> /DT <sub>90</sub> whole sys. | St. ( $\chi^2$ ) | DT <sub>50</sub> /DT <sub>90</sub> water | St. ( $\chi^2$ ) | DT <sub>50</sub> /DT <sub>90</sub> sed | St. ( $\chi^2$ ) | Method of calculation             |
| n.a.                    | 50                                                                   |        |       | 50                                            |                  | 50                                       |                  | 50                                     |                  | TGD – Part II, 2003 <sup>a)</sup> |
|                         |                                                                      |        |       |                                               |                  |                                          |                  |                                        |                  |                                   |
|                         |                                                                      |        |       |                                               |                  |                                          |                  |                                        |                  |                                   |
| Geometric mean at 20°C  |                                                                      |        |       |                                               |                  | 23.4                                     |                  |                                        |                  |                                   |

<sup>a)</sup> This value is determined based on the ready biodegradability test results and substance properties and Table 8 in the Technical Guidance Document on Risk Assessment – Part II (EU, 2003)

| Mineralisation and non extractable residues (from parent dosed experiments) |                |        |                                                   |                                                    |                                                                       |
|-----------------------------------------------------------------------------|----------------|--------|---------------------------------------------------|----------------------------------------------------|-----------------------------------------------------------------------|
| Water / sediment system                                                     | pH water phase | pH sed | Mineralisation x % after n d. (end of the study). | Non-extractable residues in sed. max x % after n d | Non-extractable residues in sed. max x % after n d (end of the study) |
| None                                                                        |                |        |                                                   |                                                    |                                                                       |
|                                                                             |                |        |                                                   |                                                    |                                                                       |
|                                                                             |                |        |                                                   |                                                    |                                                                       |

**Fate and behaviour in air (Regulation (EU) N° 283/2013, Annex Part A, point 7.3.1)**

Direct photolysis in air

*Not studied - no data requested*

Photochemical oxidative degradation in air

DT<sub>50</sub> of 2 hours derived by the Atkinson model (version US EPA AOP v.1.92). OH (12) concentration assumed =  $1.5 \times 10^6$  radicals cm<sup>-3</sup>

Volatilisation

from plant surfaces (BBA guideline): *not measured*from soil surfaces (BBA guideline): *not measured*

Metabolites

2-decanol, 2-decanone

**Residues requiring further assessment (Regulation (EU) N° 283/2013, Annex Part A, point 7.4.1)**

Environmental occurring residues requiring further assessment by other disciplines (toxicology and ecotoxicology) and or requiring consideration for groundwater exposure

Soil: (3E)-dec-3-en-2-one  
 Surface water: (3E)-dec-3-en-2-one  
 Sediment: (3E)-dec-3-en-2-one  
 Ground water: (3E)-dec-3-en-2-one  
 Air: (3E)-dec-3-en-2-one

## Definition of the residue for monitoring (Regulation (EU) N° 283/2013, Annex Part A, point 7.4.2)

|                              |
|------------------------------|
| See section 5, Ecotoxicology |
|------------------------------|

## Monitoring data, if available (Regulation (EU) N° 283/2013, Annex Part A, point 7.5)

Soil (indicate location and type of study)

Not available

Surface water (indicate location and type of study)

Not available

Ground water (indicate location and type of study)

Not available

Air (indicate location and type of study)

Not available

## PEC calculations were conducted for two routes of exposure, both relevant for application in indoor potato storage rooms;

### 1. Exposure by volatilization and deposition following release from the storage room

A conservative estimation is made of the amount of substance that reaches the soil / surface water after venting of the storage room after treatment.

For this estimation a tiered approach is used.

As a first tier, it is assumed that 0.05% of the applied dosage reaches the soil (FOCUS air, 2008).

As a second tier, equations as presented by Thibodeaux (1996) are applied to the substance and (default) storage room parameters. This approach follows the approach taken for the Renewal of the active substance 1-MCP. Three ventilation and subsequent deposition events are simulated after each indoor application of (3E)-dec-3-en-2-one.

The total estimated deposition rate per application is as follows:

|                               |                                      |
|-------------------------------|--------------------------------------|
| <b>Deposition rate (g/ha)</b> | <b>Tier 1<sup>a)</sup>:</b>          |
|                               | 2200                                 |
|                               | <b>Tier 2<sup>b)</sup>:</b>          |
|                               | 6.35 DAT1<br>3.36 DAT8<br>1.53 DAT15 |

a) Based on the assumption that 0.05% of the applied dosage reaches the soil (FOCUS air, 2008), in the first tier and the equations presented by Thibodeaux (1996) in the second tier.

b) Based on the equations for wet and dry deposition presented by Thibodeaux (1996); DAT = days after treatment

### 2. Exposure from the Sewage Treatment Plant, after processing of treated potatoes

The second route is the exposure following processing of treated potatoes. An estimation of the residue in potato (flesh and peel) is made based on residue studies and default parameters regarding potato processing. The estimation of exposure concentrations is done using the model EUSES.

Due to the difference of both routes in time and space, it is assumed that these processes do not occur simultaneously. **The maximum of both routes is considered for risk assessment.**



**PEC soil (Regulation (EU) N° 284/2013, Annex Part A, points 9.1.3 / 9.3.1)**
*Exposure route 1 – Tier 1*

|                       |                                                                                                                                                                                                                                                                                                                                  |
|-----------------------|----------------------------------------------------------------------------------------------------------------------------------------------------------------------------------------------------------------------------------------------------------------------------------------------------------------------------------|
| Parent                | DT <sub>50</sub> (d): 90 days                                                                                                                                                                                                                                                                                                    |
| Method of calculation | Kinetics: <i>SFO</i><br>Field or Lab: <i>QSAR</i>                                                                                                                                                                                                                                                                                |
| Application data      | Crop: <i>all</i><br>Depth of soil layer: 5 cm<br>Soil bulk density: 1.5g/cm <sup>3</sup><br>% plant interception: <i>none</i><br>Number of applications: 4<br>Interval (d): 28<br>Application rate:<br>Tier 1: 2200 g a.s./ha<br>Tier 2: 6.35 g a.s./ha <i>DAT1</i><br>3.36 g a.s./ha <i>DAT8</i><br>1.53 g a.s./ha <i>DAT15</i> |

| PEC <sub>(s)</sub> Tier 1<br>(mg/kg) | Single application | Single application    | Multiple application | Multiple application  |
|--------------------------------------|--------------------|-----------------------|----------------------|-----------------------|
|                                      | Actual             | Time weighted average | Actual               | Time weighted average |
| Initial                              | -                  |                       | 8.739                |                       |
| Short term 24h                       | -                  |                       | 8.672                | 8.706                 |
| 2d                                   | -                  |                       | 8.606                | 8.672                 |
| 4d                                   | -                  |                       | 8.474                | 8.606                 |
| Long term 7d                         | -                  |                       | 8.281                | 8.508                 |
| 28d                                  | -                  |                       | 7.044                | 7.861                 |
| 50d                                  | -                  |                       | 5.946                | 7.253                 |
| 100d                                 | -                  |                       | 4.046                | 6.094                 |
| Plateau concentration                | -                  |                       |                      |                       |

*Exposure route 1 – Tier 2*

| PEC <sub>(s)</sub> Tier 2<br>(mg/kg) | Single application | Single application    | Multiple application | Multiple application  |
|--------------------------------------|--------------------|-----------------------|----------------------|-----------------------|
|                                      | Actual             | Time weighted average | Actual               | Time weighted average |
| Initial                              | -                  |                       | 0.0415               |                       |
| Short term                           | 24h                | -                     | 0.0412               | 0.0414                |
|                                      | 2d                 | -                     | 0.0409               | 0.0412                |
|                                      | 4d                 | -                     | 0.0403               | 0.0409                |
| Long term                            | 7d                 | -                     | 0.0414               | 0.0406                |
|                                      | 28d                | -                     | 0.0352               | 0.0393                |
|                                      | 50d                | -                     | 0.0297               | 0.0371                |
|                                      | 100d               | -                     | 0.0202               | 0.0339                |
| Plateau concentration                | -                  |                       |                      |                       |

**Exposure route 2 - application of sewage sludge originating from treatment of waste water from potato processing industry in a STP**

|                       |                                                                                                                                                                                                                      |
|-----------------------|----------------------------------------------------------------------------------------------------------------------------------------------------------------------------------------------------------------------|
| Parent                | DT <sub>50</sub> (d): 90 days                                                                                                                                                                                        |
| Method of calculation | Kinetics: SFO<br>Field or Lab: QSAR                                                                                                                                                                                  |
| Application data      | Crop: agricultural land<br>Depth of soil layer: 20 cm<br>Soil bulk density: 1.5g/cm <sup>3</sup><br>% plant interception: none<br>Number of applications: 1<br>Interval (d): -<br>Application rate: 1085.5 g a.s./ha |

| PEC <sub>(s)</sub><br>(mg/kg) | Single application | Single application    | Multiple application | Multiple application  |
|-------------------------------|--------------------|-----------------------|----------------------|-----------------------|
|                               | Actual             | Time weighted average | Actual               | Time weighted average |
| Initial                       | 0.3618             |                       |                      |                       |
| Short term                    | 24h                | 0.3591                | 0.3604               |                       |
|                               | 2d                 | 0.3563                | 0.3591               |                       |
|                               | 4d                 | 0.3509                | 0.3563               |                       |
| Long term                     | 7d                 | 0.3428                | 0.3523               |                       |
|                               | 28d                | 0.2916                | 0.3255               |                       |
|                               | 50d                | 0.2462                | 0.3003               |                       |
|                               | 100d               | 0.1675                | 0.2523               |                       |

|                                     |                              |                                                |                                |                                                  |
|-------------------------------------|------------------------------|------------------------------------------------|--------------------------------|--------------------------------------------------|
| <b>PEC<sub>(s)</sub></b><br>(mg/kg) | Single application<br>Actual | Single application<br>Time weighted<br>average | Multiple application<br>Actual | Multiple application<br>Time weighted<br>average |
| Plateau concentration               | -                            |                                                |                                |                                                  |

Application data

Crop: *grassland*  
 Depth of soil layer: *5 cm*  
 Soil bulk density: *1.5g/cm<sup>3</sup>*  
 % plant interception: *none*  
 Number of applications: *1*  
 Interval (d): *-*  
 Application rate: *217.1 g a.s./ha*

| <b>PEC<sub>(s)</sub></b><br>(mg/kg) | Single application<br>Actual | Single application<br>Time weighted<br>average | Multiple application<br>Actual | Multiple application<br>Time weighted<br>average |
|-------------------------------------|------------------------------|------------------------------------------------|--------------------------------|--------------------------------------------------|
| Initial                             | 0.2895                       |                                                |                                |                                                  |
| Short term 24h                      | 0.2872                       | 0.2884                                         |                                |                                                  |
| 2d                                  | 0.285                        | 0.2873                                         |                                |                                                  |
| 4d                                  | 0.2807                       | 0.2851                                         |                                |                                                  |
| Long term 7d                        | 0.2743                       | 0.2818                                         |                                |                                                  |
| 28d                                 | 0.2333                       | 0.2604                                         |                                |                                                  |
| 50d                                 | 0.197                        | 0.2402                                         |                                |                                                  |
| 100d                                | 0.134                        | 0.2019                                         |                                |                                                  |
| Plateau concentration               | -                            |                                                |                                |                                                  |

**PEC ground water (Regulation (EU) N° 284/2013, Annex Part A, point 9.2.4.1)**

*Exposure route 1*

Method of calculation and type of study (e.g. modelling, field leaching, lysimeter)

For FOCUS gw modelling, values used –  
 Modelling using FOCUS model(s), with appropriate FOCUSgw scenarios, according to FOCUS guidance.  
 Model used: *PEARL 4.4.4 / PELMO 5.5.3*  
 Crop: *Winter cereals, Grass, Potatoes*  
 Crop uptake factor: *0*  
 Water solubility (mg/L): *140 at pH 7 and 24°C*  
 Vapour pressure: *430 Pa at 25°C*  
 Geometric mean parent  $DT_{50\text{ QSAR}}$  *42.2 d (normalisation to 10kPa or pF2, 20 °C with Q10 of 2.58 and Walker equation coefficient 0.7)\**  
 $K_{OC}$ : *165.2 L/kg\*\*,  $1/n=1$*   
 Metabolites: *N.a.*

Application rate

Gross application rate:  
 Tier 1: *2200 g/ha*  
 Tier 2: *6.35 g/ha DAT1*  
           *3.36 g/ha DAT8*  
           *1.53 g/ha DAT15*  
 Crop growth stage: *no interception*  
 Canopy interception %: *no interception*  
 Application rate net of interception:  
 Tier 1: *2200 g/ha*  
 Tier 2: *6.35 g/ha DAT1*  
           *3.36 g/ha DAT8*  
           *1.53 g/ha DAT15*  
 No. of applications: *4 (interval = 28 days)*  
 Time of application:                   Tier 1: *October 1st*  
                                                   Tier 2: *September 1st*  
 (to keep all 4 applications in the same year (for modelling purposes; acceptable date for storage season for potatoes))

\* For Tier 1 modelling a  $DT_{50}$  value of 47.5 days was used, based on a  $Q_{10}$  value of 2.2, instead of the correct value of 42.2 days based on a  $Q_{10}$  of 2.58.

\*\* lowest value of 3 QSAR estimates, for conservativeness.

### PEC(gw) - FOCUS modelling results (80<sup>th</sup> percentile annual average concentration at 1m)

| PELMO/Winter cereals | Scenario   | Parent (µg/L) |        |
|----------------------|------------|---------------|--------|
|                      |            | Tier 1        | Tier 2 |
|                      | Chateaudun | < 0.001       | 0.001  |
| Hamburg              | < 0.001    | 0.001         |        |
| Jokioinen            | < 0.001    | 0.002         |        |
| Kremsmunster         | < 0.001    | 0.001         |        |
| Okehampton           | < 0.001    | 0.001         |        |

|  |          |         |        |
|--|----------|---------|--------|
|  | Piacenza | < 0.001 | 0.001  |
|  | Porto    | < 0.001 | 0.001  |
|  | Sevilla  | < 0.001 | <0.001 |
|  | Thiva    | < 0.001 | 0.001  |

| PELMO/Grass | Scenario     | Parent (µg/L) |        |
|-------------|--------------|---------------|--------|
|             |              | Tier 1        | Tier 2 |
|             | Chateaudun   | < 0.001       | <0.001 |
|             | Hamburg      | < 0.001       | 0.001  |
|             | Jokioinen    | < 0.001       | 0.002  |
|             | Kremsmunster | < 0.001       | 0.001  |
|             | Okehampton   | < 0.001       | 0.001  |
|             | Piacenza     | < 0.001       | 0.001  |
|             | Porto        | < 0.001       | 0.001  |
|             | Sevilla      | < 0.001       | <0.001 |
|             | Thiva        | < 0.001       | 0.001  |

| PELMO/Potatoes | Scenario     | Parent (µg/L) |        |
|----------------|--------------|---------------|--------|
|                |              | Tier 1        | Tier 2 |
|                | Chateaudun   | < 0.001       | <0.001 |
|                | Hamburg      | < 0.001       | 0.001  |
|                | Jokioinen    | < 0.001       | 0.001  |
|                | Kremsmunster | < 0.001       | 0.001  |
|                | Okehampton   | < 0.001       | 0.001  |
|                | Piacenza     | < 0.001       | 0.001  |
|                | Porto        | < 0.001       | 0.001  |
|                | Sevilla      | < 0.001       | <0.001 |
|                | Thiva        | < 0.001       | 0.001  |

| PEARL / Winter cereals | Scenario     | Parent (µg/L) |              |
|------------------------|--------------|---------------|--------------|
|                        |              | Tier 1        | Tier 2       |
|                        | Chateaudun   | 19.85         | 0.070        |
|                        | Hamburg      | 15.89         | 0.062        |
|                        | Jokioinen    | 31.10         | <b>0.110</b> |
|                        | Kremsmunster | 16.79         | 0.065        |

|  |            |       |       |
|--|------------|-------|-------|
|  | Okehampton | 20.16 | 0.083 |
|  | Piacenza   | 13.60 | 0.054 |
|  | Porto      | 14.00 | 0.039 |
|  | Sevilla    | 7.75  | 0.022 |
|  | Thiva      | 10.25 | 0.047 |

| PEARL / Grass | Scenario     | Parent (µg/L) |              |
|---------------|--------------|---------------|--------------|
|               |              | Tier 1        | Tier 2       |
|               | Chateaudun   | 16.16         | 0.066        |
|               | Hamburg      | 13.80         | 0.063        |
|               | Jokioinen    | 14.29         | <b>0.133</b> |
|               | Kremsmunster | 14.16         | 0.060        |
|               | Okehampton   | 17.74         | 0.076        |
|               | Piacenza     | 10.28         | 0.058        |
|               | Porto        | 11.11         | 0.040        |
|               | Sevilla      | 6.68          | 0.031        |
|               | Thiva        | 8.09          | 0.039        |

| PEARL / Potatoes | Scenario     | Parent (µg/L) |        |
|------------------|--------------|---------------|--------|
|                  |              | Tier 1        | Tier 2 |
|                  | Chateaudun   | 22.53         | 0.052  |
|                  | Hamburg      | 16.06         | 0.056  |
|                  | Jokioinen    | 25.49         | 0.064  |
|                  | Kremsmunster | 18.26         | 0.055  |
|                  | Okehampton   | 22.73         | 0.066  |
|                  | Piacenza     | 13.26         | 0.043  |
|                  | Porto        | 14.42         | 0.034  |
|                  | Sevilla      | 2.55          | 0.031  |
|                  | Thiva        | 16.26         | 0.037  |

*Exposure route 2*

Method of calculation and type of study (e.g. modelling, field leaching, lysimeter)

For FOCUS gw modelling, values used –  
 Modelling using FOCUS model(s), with appropriate FOCUSgw scenarios, according to FOCUS guidance.  
 Model used: *PEARL 4.4.4 / PELMO 5.5.3*  
 Crop: *Winter cereals, Grass, Potatoes*  
 Crop uptake factor: *0*  
 Water solubility (mg/L): *140 at pH 7 and 24°C*  
 Vapour pressure: *430 Pa at 25°C*  
 Geometric mean parent DT<sub>50 QSAR</sub> *42.2 d (normalisation to 10kPa or pF2, 20 °C with Q10 of 2.58 and Walker equation coefficient 0.7).\**  
 K<sub>oc</sub>: *165.2 / 1069 L/kg \*, 1/n = 1*  
 Metabolites: *N.a.*

Application rate

Gross application rate:  
 Potatoes, winter cereals:  
 187 g a.s./ha (sludge conc. based on low Koc)  
 1085.5g a.s./ha (sludge conc. based on high Koc)  
 Grass:  
 32.4 g a.s./ha (sludge conc. based on low Koc)  
 217.1 g a.s./ha (sludge conc. based on high Koc)  
 Crop growth stage: *no interception*  
 Canopy interception %: *no interception*  
 Application rate net of interception:  
 No. of applications: *1*  
 Time of application: *November 1st*  
 Application type:  
*FOCUS PEARL 4.4.4 : Soil incorporation over 20 cm (winter cereals, potatoes) and 5 cm (grass) (FOCUS PEARL 4.4.4)*  
*FOCUS PELMO 5.5.3 : Soil application at the soil surface (depth 0.2 m: winter cereals, potatoes; depth 0.05m: grass)*

\* two simulations: one using sludge concentration based on a high Koc and a high Koc in FOCUS PEARL & FOCUS PELMO (i.e. Koc of 1069 mL/g), and one using sludge concentration based on a low Koc and a low Koc in FOCUS PEARL & FOCUS PELMO (i.e. Koc of 165.2 mL/g)

| PELMO/Winter cereals | Scenario     | Parent (µg/L) |          |
|----------------------|--------------|---------------|----------|
|                      |              | Low Koc       | High Koc |
|                      | Chateaudun   | 0.398         | 0.001    |
|                      | Hamburg      | 0.824         | 0.13     |
|                      | Jokioinen    | 2.301         | 0.652    |
|                      | Kremsmunster | 1.054         | 0.014    |

|  |            |       |        |
|--|------------|-------|--------|
|  | Okehampton | 1.388 | 0.088  |
|  | Piacenza   | 0.755 | 0.158  |
|  | Porto      | 0.859 | 0.135  |
|  | Sevilla    | 0.207 | <0.001 |
|  | Thiva      | 1.426 | 0.058  |

| PELMO/Grass | Scenario     | Parent (µg/L) |          |
|-------------|--------------|---------------|----------|
|             |              | Low Koc       | High Koc |
|             | Chateaudun   | 0.016         | <0.001   |
|             | Hamburg      | 0.092         | 0.002    |
|             | Jokioinen    | 0.134         | 0.012    |
|             | Kremsmunster | 0.189         | 0.007    |
|             | Okehampton   | 0.078         | 0.001    |
|             | Piacenza     | 0.07          | <0.001   |
|             | Porto        | 0.063         | <0.001   |
|             | Sevilla      | 0.013         | <0.001   |
|             | Thiva        | 0.018         | <0.001   |

| PELMO/Potatoes | Scenario     | Parent (µg/L) |          |
|----------------|--------------|---------------|----------|
|                |              | Low Koc       | High Koc |
|                | Chateaudun   | 0.299         | <0.001   |
|                | Hamburg      | 1.371         | 0.185    |
|                | Jokioinen    | 0.966         | 0.049    |
|                | Kremsmunster | 0.794         | 0.011    |
|                | Okehampton   | 1.258         | 0.051    |
|                | Piacenza     | 0.829         | 0.009    |
|                | Porto        | 0.871         | 0.005    |
|                | Sevilla      | 0.342         | 0.001    |
|                | Thiva        | 0.492         | 0.002    |

| PEARL / Winter cereals | Scenario   | Parent (µg/L) |          |
|------------------------|------------|---------------|----------|
|                        |            | Low Koc       | High Koc |
|                        | Chateaudun | 0.905         | 0.27     |
|                        | Hamburg    | 0.658         | 0.30     |
|                        | Jokioinen  | 0.824         | 2.34     |



|  |              |       |      |
|--|--------------|-------|------|
|  | Kremsmunster | 0.798 | 0.06 |
|  | Okehampton   | 1.029 | 0.46 |
|  | Piacenza     | 0.577 | 0.18 |
|  | Porto        | 0.465 | 0.13 |
|  | Sevilla      | 0.229 | 0.19 |
|  | Thiva        | 0.548 | 0.34 |

| PEARL / Grass | Scenario     | Parent (µg/L) |          |
|---------------|--------------|---------------|----------|
|               |              | Low Koc       | High Koc |
|               | Chateaudun   | 0.068         | 0.001    |
|               | Hamburg      | 0.086         | 0.02     |
|               | Jokioinen    | 0.153         | 0.04     |
|               | Kremsmunster | 0.071         | 0.002    |
|               | Okehampton   | 0.085         | 0.01     |
|               | Piacenza     | 0.074         | 0.01     |
|               | Porto        | 0.060         | 0.002    |
|               | Sevilla      | 0.047         | 0.01     |
|               | Thiva        | 0.057         | 0.005    |

| PEARL / Potatoes | Scenario     | Parent (µg/L) |          |
|------------------|--------------|---------------|----------|
|                  |              | Low Koc       | High Koc |
|                  | Chateaudun   | 0.755         | 0.08     |
|                  | Hamburg      | 0.594         | 0.25     |
|                  | Jokioinen    | 0.634         | 0.35     |
|                  | Kremsmunster | 0.589         | 0.05     |
|                  | Okehampton   | 0.899         | 0.30     |
|                  | Piacenza     | 0.524         | 0.17     |
|                  | Porto        | 0.380         | 0.04     |
|                  | Sevilla      | 0.533         | 0.25     |
|                  | Thiva        | 0.655         | 0.12     |

**PEC<sub>(gw)</sub>** From lysimeter / field studies

| Parent                | 1 <sup>st</sup> year | 2 <sup>nd</sup> year | 3 <sup>rd</sup> year |
|-----------------------|----------------------|----------------------|----------------------|
| Annual average (µg/L) | -                    |                      |                      |

| Metabolite X          | 1 <sup>st</sup> year | 2 <sup>nd</sup> year | 3 <sup>rd</sup> year |
|-----------------------|----------------------|----------------------|----------------------|
| Annual average (µg/L) | -                    |                      |                      |

### PEC surface water and PEC sediment (Regulation (EU) N° 284/2013, Annex Part A, points 9.2.5 / 9.3.1)

#### Exposure route 1

Parent

Parameters used in FOCUSsw step 1 and 2

Version control no. of FOCUS calculator: *version 3.2*

Molecular weight (g/mol):

$K_{OC}/K_{OM}$  (mL/g): 165.2 / 1069 L/kg

DT<sub>50</sub> soil (d): 42.2 *days*\*

DT<sub>50</sub> water/sediment system (d): 23.4 *d*\*

DT<sub>50</sub> water (d): 23.4 *d*\*

DT<sub>50</sub> sediment (d): 23.4 *d*\*

Crop interception (%): *none*

Parameters used in FOCUSsw step 3 (if performed)

*Not needed*

Application rate

Crop and growth stage: *Aerial spray (the application rate is corrected for the drift from the scenario 'aerial spray' in order to reach 100% deposition for all applications.*

Number of applications: 12\*\*

Interval (d): 7\*\*

Application rate:

*Tier 2: 3.75\*\* g a.s./ha (corrected before modelling, see under 'crop and growth stage').*

Region and season of application:

*No runoff/drainage*

\* *default value of 90 days (12 °C) for substances classified as "readily biodegradable, but failing the 10 days window" according to REACH/biocides Guidance (ECHA, 2017; 2016), normalised to 20 °C using Q10 of 2.58*

\*\* *due to the limitations of Steps 1-2 in FOCUS, the three deposition events following each indoor application were simulated as three deposition events of 3.75 g a.s./ha and an interval of 7 days; in total 12 applications of 3.75 g/ha and an interval of 7 days were simulated.*

| FOCUS STEP 2<br>Scenario       | Day after<br>overall<br>maximum | PEC <sub>SW</sub> (µg/L) |        | PEC <sub>SED</sub> (µg/kg) |         |
|--------------------------------|---------------------------------|--------------------------|--------|----------------------------|---------|
|                                |                                 | Actual                   | TWA    | Actual                     | TWA     |
| Low Koc<br>No runoff/drainage  | 0 h                             | 5.4993                   |        | 5.6384                     |         |
|                                | 24 h                            | 5.1927                   | 5.346  | 5.5379                     | 5.5881  |
|                                | 2 d                             | 5.0326                   | 5.2293 | 5.38                       | 5.5235  |
|                                | 4 d                             | 4.7426                   | 5.0579 | 5.0707                     | 5.3739  |
|                                | 7 d                             | 4.3393                   | 4.8352 | 4.6395                     | 5.1503  |
|                                | 14 d                            | 3.5267                   | 4.3772 | 3.7707                     | 4.6704  |
|                                | 21 d                            | 2.8663                   | 3.9799 | 3.0646                     | 4.2488  |
|                                | 28 d                            | 2.3295                   | 3.6321 | 2.4907                     | 3.8786  |
|                                | 42 d                            | 1.5387                   | 3.0571 | 1.6452                     | 3.2654  |
| High Koc<br>No runoff/drainage | 0 h                             | 3.7491                   |        | 20.9235                    |         |
|                                | 24 h                            | 3.164                    | 3.4565 | 20.4418                    | 20.6826 |
|                                | 2 d                             | 2.9812                   | 3.2645 | 19.8697                    | 20.4192 |
|                                | 4 d                             | 2.7897                   | 3.0729 | 18.7322                    | 19.8584 |
|                                | 7 d                             | 2.5518                   | 2.8998 | 17.1395                    | 19.03   |
|                                | 14 d                            | 2.0739                   | 2.6023 | 13.9299                    | 17.2552 |
|                                | 21 d                            | 1.6855                   | 2.3592 | 11.3213                    | 15.6973 |
|                                | 28 d                            | 1.3699                   | 2.15   | 9.2012                     | 14.3293 |
|                                | 42 d                            | 0.9049                   | 1.8072 | 6.0777                     | 12.0637 |

### Exposure route 2

The distribution of (3E)-3-dec-3-en-2-one in sewage treatment plant (STP), following discharge of waste water from potato processing facilities, was estimated using SimpleTreat 4.0 according to REACH and biocides Guidance (ECHA, 2016 and 2017). The main input parameters are presented below:

| Emission scenario                                   | Unit           | Value                                             |
|-----------------------------------------------------|----------------|---------------------------------------------------|
| Quantity of potatoes processed per day per plant    | [T/d]          | 1161                                              |
| a.i. residues on processed potatoes                 | [mg/kg]        | 1.5                                               |
| Share of potatoes treated with the a.i.             | [%]            | 100                                               |
| Share of residues released to the cleaning water    | [%]            | 100                                               |
| a.i. emitted per day (Elocalwater)                  | [kg/d]         | 1.7415                                            |
| <b>parameters</b>                                   |                |                                                   |
| Molecular weight                                    | [g/mol]        | 154.25                                            |
| organic carbon-water partitioning coefficient (Koc) | [mL/g]         | 165.2/1069                                        |
| Vapour pressure                                     | [Pa at 25°C]   | 430                                               |
| Solubility                                          | [mg/L at 24°C] | 140                                               |
| Biodegradation                                      |                | Ready biodegradable,<br>not fulfilling 10d window |

Estimated distribution of (3E)-dec-3-en-2-one in a STP using SimpleTreat 4.0 and resulting predicted environmental concentrations in surface water and sediment according to REACH and biocides Guidance (ECHA, 2016 and 2017), presented in the table below:

| Distribution                     | Unit               | scenario       |               |
|----------------------------------|--------------------|----------------|---------------|
|                                  |                    | Koc 165.2 mL/g | Koc 1069 mL/g |
| F stp air                        | [%]                | 52.33          | 48.35         |
| F stp water                      | [%]                | 9.1            | 8.47          |
| F stp sludge                     | [%]                | 1.52           | 8.85          |
| Fstp biodegraded                 | [%]                | 37.05          | 34.33         |
| <b>Concentrations</b>            |                    |                |               |
| PEC <sub>effluent</sub>          | [µg/L]             | 79.22          | 73.75         |
| PEC <sub>dry,sewage sludge</sub> | [mg/kg]            | 37.4           | 217.1         |
| PEC <sub>sw</sub> (large river)  | [µg/L]             | 7.92           | 7.36          |
| PEC <sub>SED</sub>               | [mg/kg dry weight] | 0.875          | 0.813         |

Predicted environmental concentrations in surface water, resulting from direct discharge of waste water from potato processing industry onto surface water, are presented in the table below:

| Scenario          | Emission of (3E)-3-decen-2-one [g/ha] | Receiving water body | Flow rate of water body [m <sup>3</sup> /d] | PEC <sub>sw</sub> [µg a.s./L] |
|-------------------|---------------------------------------|----------------------|---------------------------------------------|-------------------------------|
| Unpeeled Potatoes | 174.15 <sup>*</sup>                   | Small river          | 6000                                        | 290                           |
| Unpeeled Potatoes | 174.15 <sup>*</sup>                   | Large river          | 20000                                       | 87.1                          |
| Unpeeled Potatoes | 40.05 <sup>#</sup>                    | Small river          | 6000                                        | 6.7                           |
| Unpeeled Potatoes | 40.05 <sup>#</sup>                    | Large river          | 20000                                       | 2.0                           |

<sup>\*</sup> based on median residue value of 1.5 mg/kg 14 days after the last treatment, based on measured residues of Bortolomé (2016) and Van den Sandt (2020), and a total of 1161 tonnes potatoes processed per day

<sup>#</sup> based on median residue value of 0.0345 mg/kg 28 days after the last treatment, based on measured residues of Bortolomé (2016), and a total of 1161 tonnes potatoes processed per day

### Estimation of concentrations from other routes of exposure (Regulation (EU) N° 284/2013, Annex Part A, point 9.4)

Method of calculation

-

PEC

Maximum concentration

*Not assessed, not relevant*



## Ecotoxicology

### Effects on terrestrial vertebrates (Annex IIA, point 8.1, Annex IIIA, points 10.1 and 10.3)

| Species                                                                                                                                                                                                                                                                                                                                                                                                                                                 | Test substance | Time scale                       | End point (mg/kg bw/day) | End point (mg/kg feed) |
|---------------------------------------------------------------------------------------------------------------------------------------------------------------------------------------------------------------------------------------------------------------------------------------------------------------------------------------------------------------------------------------------------------------------------------------------------------|----------------|----------------------------------|--------------------------|------------------------|
| Birds ‡                                                                                                                                                                                                                                                                                                                                                                                                                                                 |                |                                  |                          |                        |
| Bobwhite quail                                                                                                                                                                                                                                                                                                                                                                                                                                          | a.s.           | Acute                            | -                        |                        |
| Bobwhite quail                                                                                                                                                                                                                                                                                                                                                                                                                                          | a.s.           | Long-term                        | -                        |                        |
| Mammals ‡                                                                                                                                                                                                                                                                                                                                                                                                                                               |                |                                  |                          |                        |
| Rat                                                                                                                                                                                                                                                                                                                                                                                                                                                     | a.s.           | Acute                            | >5000                    |                        |
| Rat                                                                                                                                                                                                                                                                                                                                                                                                                                                     | a.s.           | Long-term (teratogenicity study) | 1000                     |                        |
| Endocrine disrupting properties (Annex Part A, points 8.1.5)<br>In view of the intrinsic properties of the active substance and the (eco)toxicological profile of the substance the assessment does not appear scientifically necessary. (3E)-dec-3-en-2-one does not to meet the criteria for endocrine disruption for humans according to point 3.8.2 of Annex II to Regulation (EC) No 1107/2009, as amended by Commission Regulation (EU) 2018/605. |                |                                  |                          |                        |
| Additional higher tier studies ‡                                                                                                                                                                                                                                                                                                                                                                                                                        |                |                                  |                          |                        |
|                                                                                                                                                                                                                                                                                                                                                                                                                                                         |                |                                  |                          |                        |

### Toxicity/exposure ratios for terrestrial vertebrates (Annex IIIA, points 10.1 and 10.3)

Not required.

The representative use of (3E)-dec-3-en-2-one envisages indoor (i.e., warehouse) applications in potato, for which the dietary exposure and risks to birds and mammals is likely low. Conversely, the exposure via consumption of contaminated water and secondary poisoning (i.e., via earthworms or fish) could not be excluded.

However, the risk to birds and mammals from these exposure routes could be considered low, considering the indication of low toxicity to mammals and the following lines of evidence:

- (3E)-dec-3-en-2-one is a naturally occurring (fruits, juices, spices, vegetables, coffee and tea) acyclic aliphatic ketone that is also used as a food flavouring ingredient.
- It is rapidly metabolised (known to be metabolised rapidly and extensively to innocuous substances).
- Previous evaluations by EFSA and JFCFA considered (3E)-dec-3-en-2-one acceptable for use as food flavouring (EFSA FAF Panel opinion, 2019 and EFSA FAF Panel, 2022; JECFA, 2002). Additionally, as collateral information, an evaluation by the US FDA was acknowledged to result in a GRAS (generally regarded as safe) classification.
- (3E)-dec-3-en-2-one is readily biodegradable and its DT<sub>50</sub> in air is 2h.

The outcome of the illustrative risk assessment by the RMS is presented under Vol.3 B9

### Toxicity data for aquatic species (most sensitive species of each group) (Annex IIA, point 8.2, Annex IIIA, point 10.2)

| Group              | Test substance | Time-scale (Test type) | End point | Toxicity <sup>1</sup> (mg/L) |
|--------------------|----------------|------------------------|-----------|------------------------------|
| Laboratory tests ‡ |                |                        |           |                              |

| Group                                                                                                                                                                                                                                                                                                                                                                                   | Test substance | Time-scale<br>(Test type)     | End point                                                                              | Toxicity <sup>1</sup><br>(mg/L)          |
|-----------------------------------------------------------------------------------------------------------------------------------------------------------------------------------------------------------------------------------------------------------------------------------------------------------------------------------------------------------------------------------------|----------------|-------------------------------|----------------------------------------------------------------------------------------|------------------------------------------|
| Fish                                                                                                                                                                                                                                                                                                                                                                                    |                |                               |                                                                                        |                                          |
| <i>Oncorhynchus mykiss</i>                                                                                                                                                                                                                                                                                                                                                              | a.s.           | 96 h (flow-through)           | Mortality, EC <sub>50</sub>                                                            | 1.50 (mm)                                |
| Aquatic invertebrate                                                                                                                                                                                                                                                                                                                                                                    |                |                               |                                                                                        |                                          |
| <i>Daphnia magna</i>                                                                                                                                                                                                                                                                                                                                                                    | a.s.           | 48 h (static)                 | Mortality, EC <sub>50</sub>                                                            | 1.68 (mm)                                |
| Sediment dwelling organisms                                                                                                                                                                                                                                                                                                                                                             |                |                               |                                                                                        |                                          |
| <i>Chironomus riparius</i>                                                                                                                                                                                                                                                                                                                                                              | a.s.           | 28d (static, spiked sediment) | Cumulative emergence, NOEC                                                             | 31.4 mg/kg sediment dw (mm) <sup>2</sup> |
| Algae                                                                                                                                                                                                                                                                                                                                                                                   |                |                               |                                                                                        |                                          |
| <i>Pseudokirchneriella subcapitata</i>                                                                                                                                                                                                                                                                                                                                                  | a.s.           | 72 h (static)                 | E <sub>r</sub> C <sub>50</sub>                                                         | 2.3 (mm)                                 |
|                                                                                                                                                                                                                                                                                                                                                                                         |                |                               | E <sub>y</sub> C <sub>50</sub>                                                         | 0.55 (mm)                                |
| Aquatic plants                                                                                                                                                                                                                                                                                                                                                                          |                |                               |                                                                                        |                                          |
| <i>Lemna gibba</i>                                                                                                                                                                                                                                                                                                                                                                      | a.s.           | 7 day (semi-static)           | Biomass: E <sub>y</sub> C <sub>50</sub><br>Growth rate: E <sub>r</sub> C <sub>50</sub> | 1.69 (mm)<br>2.84 (mm)                   |
| Microcosm or mesocosm tests                                                                                                                                                                                                                                                                                                                                                             |                |                               |                                                                                        |                                          |
| -                                                                                                                                                                                                                                                                                                                                                                                       |                |                               |                                                                                        |                                          |
| Endocrine disrupting properties (Annex Part A, points 8.2.3)                                                                                                                                                                                                                                                                                                                            |                |                               |                                                                                        |                                          |
| In view of the intrinsic properties of the active substance and the (eco)toxicological profile of the substance the assessment does not appear scientifically necessary. (3E)-dec-3-en-2-one does not to meet the criteria for endocrine disruption for humans according to point 3.8.2 of Annex II to Regulation (EC) No 1107/2009, as amended by Commission Regulation (EU) 2018/605. |                |                               |                                                                                        |                                          |

<sup>1</sup> indicate whether based on nominal (nom) or mean measured concentrations (mm). In the case of preparations indicate whether end points are presented as units of preparation or a.s.

<sup>2</sup>reliable with restriction, due to analytical issues (i.e., test item stability in sediment) and lack of analytical verification in pore water.

#### Maximum PEC<sub>sw</sub> values and TER values for (3E)-dec-3-en-2-one application to potatoes

| Scenario                   | PEC max<br>(µg L) <sup>1</sup> | fish acute                           | Daphnia acute                       | algae                                                   | plants                                               |
|----------------------------|--------------------------------|--------------------------------------|-------------------------------------|---------------------------------------------------------|------------------------------------------------------|
|                            |                                | <i>O. mykiss</i><br>LC <sub>50</sub> | <i>D. magna</i><br>EC <sub>50</sub> | <i>P. subcapitata</i><br>E <sub>r</sub> C <sub>50</sub> | <i>Lemna gibba</i><br>E <sub>r</sub> C <sub>50</sub> |
|                            |                                | 1500 µg/L                            | 1680 µg/L                           | 2300 µg/L                                               | 2840 µg/L                                            |
| <b>Large surface water</b> |                                | TER                                  | TER                                 | TER                                                     | TER                                                  |
|                            | 7.92                           | 189                                  | 212                                 | 290                                                     | 359                                                  |

| Emission scenario <sup>(1)</sup> | PEC <sub>SED</sub><br>(mg/kg) | TER <sub>Chironomus</sub> |
|----------------------------------|-------------------------------|---------------------------|
| STP route                        | 0.875                         | 36                        |
| Annex VI trigger                 |                               | 10                        |

| <b>Bioconcentration</b>                                                         |                  |             |             |             |
|---------------------------------------------------------------------------------|------------------|-------------|-------------|-------------|
|                                                                                 | Active substance | Metabolite1 | Metabolite2 | Metabolite3 |
| logP <sub>O/W</sub>                                                             | 3.45             | -           | -           | -           |
| Bioconcentration factor (BCF) <sup>1</sup> ‡                                    | *                | -           | -           | -           |
| Annex VI Trigger for the bioconcentration factor                                | 100              | -           | -           | -           |
| Clearance time (days) (CT <sub>50</sub> )                                       |                  |             |             |             |
| (CT <sub>90</sub> )                                                             |                  |             |             |             |
| Level and nature of residues (%) in organisms after the 14 day depuration phase | -                |             |             |             |

<sup>1</sup> only required if log P<sub>O/W</sub> >3.

\* No experimentally derived BCF value was available for the active substance. However, the risk to birds and mammals through secondary poisoning was considered low, based on the weight of evidence reported above.

#### Effects on honeybees (Annex IIA, point 8.3.1, Annex IIIA, point 10.4)

No toxicity tests were performed on bees.

However, considering that i) the representative use of (3E)-dec-3-en-2-one is indoor and ii) the exposure through air deposition was considered low, low risk is indicated for honey bees.

#### Effects on other arthropod species (Annex IIA, point 8.3.2, Annex IIIA, point 10.5)

No toxicity tests were performed on other arthropod species.

However, considering that i) the representative use of (3E)-dec-3-en-2-one is indoor and ii) the exposure through air deposition was considered low, low risk is indicated for non-target arthropods other than bees.

#### Effects on earthworms, other soil macro-organisms and soil micro-organisms (Annex IIA points 8.4 and 8.5, Annex IIIA, points, 10.6 and 10.7)

No toxicity tests were performed on earthworms, other soil macro-organisms and soil micro-organisms.

However, considering that i) the representative use of (3E)-dec-3-en-2-one is indoor and ii) the exposure through air deposition was considered low, low risk is indicated for soil macro- and micro-organisms.

#### Effects on non target plants (Annex IIA, point 8.6, Annex IIIA, point 10.8)

No toxicity tests were performed on non target plants.

However, considering that i) the representative use of (3E)-dec-3-en-2-one is indoor and ii) the exposure through air deposition was considered low, low risk is indicated for non-target terrestrial plants.

#### Effects on biological methods for sewage treatment (Annex IIA 8.7)

| Test type/organism    | end point      |
|-----------------------|----------------|
| Activated sludge      | 93.7 mg a.s./L |
| <i>Pseudomonas sp</i> |                |

#### Ecotoxicologically relevant compounds

Active substance (in terms of compound under consideration, e.g. a variant such as an ester) must always be included in the soil, water and groundwater compartment. Ecotoxicological relevance of metabolites should be based on risk assessment.



|             |        |
|-------------|--------|
| Compartment |        |
| soil        | Parent |
| water       | Parent |
| sediment    | Parent |
| groundwater | Parent |

**Classification and proposed labelling with regard to ecotoxicological data (Annex IIA, point 10 and Annex IIIA, point 12.3)**

Substance

Harmonised classification according to Regulation (EC) No 1272/2008 and its Adaptations to Technical Process [Table 3.1 of Annex VI of Regulation (EC) No 1272/2008 as amended]<sup>6</sup>:

According to the peer review, criteria for harmonised classification according to Regulation (EC) No 1272/2008 may be met for:

(3E)-dec-3-en-2-one

No current harmonised classification.  
RAC Opinion (2022):  
Aquatic Chronic 2 (H 411)

-

<sup>6</sup> Regulation (EC) No 1272/2008 of the European Parliament and of the Council of 16 December 2008 on classification, labelling and packaging of substances and mixtures, amending and repealing Directives 67/548/EEC and 1999/45/EC, and amending Regulation (EC) No 1907/2006. OJ L 353, 31.12.2008, 1-1355.
